# 1       **The development of intracytoplasmic membranes in alphaproteobacteria** 2       **involves the conserved mitochondrial crista-developing protein Mic60**

3 Sergio A. Muñoz-Gómez<sup>1,\*</sup>, Lawrence Rudy Cadena<sup>2,3,\*</sup>, Alastair T. Gardiner<sup>4</sup>, Michelle M. Leger<sup>5</sup>,  
4 Shaghayegh Sheikh<sup>2,3</sup>, Louise Connell<sup>6</sup>, Tomáš Bily<sup>2,3</sup>, Karel Kopejtká<sup>4</sup>, J. Thomas Beatty<sup>7</sup>, Michal  
5 Koblížek<sup>4</sup>, Andrew J. Roger<sup>8</sup>, Claudio H. Slamovits<sup>8</sup>, Julius Lukeš<sup>2,3</sup>, Hassan Hashimi<sup>2,3,+</sup>

## 6       **Affiliations**

7       <sup>1</sup>Ecologie Systématique Evolution, Université Paris-Saclay, AgroParisTech, Orsay, France.

8       <sup>2</sup>Institute of Parasitology, Biology Center, Czech Academy of Sciences, České Budějovice (Budweis),  
9       Czech Republic.

10       <sup>3</sup>Faculty of Science, University of South Bohemia, České Budějovice (Budweis), Czech Republic.

11       <sup>4</sup>Center Algatech, Institute of Microbiology, Czech Academy of Sciences, Třeboň, Czech Republic.

12       <sup>5</sup>Institute of Evolutionary Biology (CSIC-Universitat Pompeu Fabra), Barcelona, Catalonia, Spain.

13       <sup>6</sup>Department of Chemistry and Biomolecular Sciences, University of Ottawa, Ottawa, Canada.

14       <sup>7</sup>Department of Microbiology and Immunology, University of British Columbia, Vancouver, Canada.

15       <sup>8</sup>Centre for Comparative Genomics and Evolutionary Bioinformatics, Department of Biochemistry and  
16       Molecular Biology, Dalhousie University, Halifax, Nova Scotia, Canada.

17

18       \*Equal contribution

19       +Correspondence to: sergio.munoz@universite-paris-saclay.fr; hassan@paru.cas.cz

## 20       **Abstract**

21 Mitochondrial cristae expand the surface area of respiratory membranes and ultimately allow for the  
22 evolutionary scaling of respiration with cell volume across eukaryotes. The discovery of Mic60  
23 homologs among alphaproteobacteria, the closest extant relatives of mitochondria, suggested that  
24 cristae might have evolved from bacterial intracytoplasmic membranes (ICMs). Here, we investigated  
25 the predicted structure and function of alphaproteobacterial Mic60, and a protein encoded by an  
26 adjacent gene Orf52, in two distantly related purple alphaproteobacteria, *Rhodobacter sphaeroides*  
27 and *Rhodopseudomonas palustris*. In addition, we assessed the potential physical interactors of  
28 Mic60 and Orf52 in *R. sphaeroides*. We show that the three  $\alpha$ -helices of mitochondrial Mic60's  
29 mitofilin domain, as well as its adjacent membrane-binding amphipathic helix, are present in  
30 alphaproteobacterial Mic60. The disruption of Mic60 and Orf52 caused photoheterotrophic growth  
31 defects, which are most severe under low light conditions, and both their disruption and  
32 overexpression led to enlarged ICMs in both studied alphaproteobacteria. We also found that  
33 alphaproteobacterial Mic60 physically interacts with BamA, the homolog of Sam50, one of the main  
34 physical interactors of eukaryotic Mic60. This interaction, responsible for making contact sites at  
35 mitochondrial envelopes, has been conserved in modern alphaproteobacteria despite more than a  
36 billion years of evolutionary divergence. Our results suggest a role for Mic60 in photosynthetic ICM  
37 development and contact site formation at alphaproteobacterial envelopes. Overall, we provide  
38 support for the hypothesis that mitochondrial cristae evolved from alphaproteobacterial ICMs, and  
39 therefore have improved our understanding of the nature of the mitochondrial ancestor.

40       **Keywords:** *Cereibacter*, *Rhodobacter*, *Rhodopseudomonas*, chromatophores, eukaryote,  
41       endosymbiosis, MICOS.

## 42       **Introduction**

43 Mitochondria are organelles inferred to have been present in the last common ancestor of all  
44 eukaryotes (reviewed in Roger et al. 2017). Unlike most other organelles (e.g., the endoplasmic  
45 reticulum, nucleus, cytoskeleton, etc.), the mitochondrion evolved from an endosymbiont most closely  
46 related to extant alphaproteobacteria<sup>2-4</sup>. In aerobic eukaryotes, mitochondria produce most of the  
47 ATP of the cell through aerobic respiration, i.e., the harnessing of energy through the coupling of  
48 electron transport to chemiosmosis with oxygen as a terminal electron acceptor. Mitochondria also  
49 compartmentalize other metabolic pathways<sup>1,5</sup>. Because aerobic respiration occurs at internalized  
50 membranes that can expand greatly, mitochondria allow for the proportional increase (or linear

51 scaling) of respiration with cell volume across eukaryotes<sup>6</sup>. Mitochondria are thus one of the  
52 innovations that likely allowed many eukaryotes to achieve larger cell volumes coupled to relatively  
53 fast growth rates, and ultimately opened new evolutionary trajectories. Elucidating the origin of  
54 mitochondria and their respiratory membranes may shed light on the origin of eukaryotic cells.

55 The specialization of mitochondria as respiratory organelles is most clearly reflected in their internal  
56 structure. The mitochondrial inner membrane invaginates into specialized sub-compartments called  
57 cristae, the structural hallmarks of the organelle<sup>7-9</sup>. The MICOS (Mitochondrial Contact Site and  
58 Cristae Organizing System) complex and oligomers of the F<sub>1</sub>F<sub>0</sub>-ATP synthase are two of the most  
59 evolutionarily conserved factors responsible for the development and shape of cristae<sup>10,11</sup>. Whereas  
60 ATP synthase oligomers bend crista membranes at their rims to produce diverse crista shapes<sup>12,13</sup>,  
61 the MICOS complex creates both crista junctions and contact sites that compartmentalize, stably  
62 anchor, and maintain cristae at the mitochondrial envelope<sup>14</sup>. These functions of the MICOS complex  
63 appear to be largely conserved across phylogenetically disparate eukaryotes, such as in the animal  
64 *Homo sapiens*, the fungus *Saccharomyces cerevisiae*, the land plant *Arabidopsis thaliana*, and the  
65 parasitic protist *Trypanosoma brucei*<sup>15-18</sup>.

66 Studies on the evolutionary history of MICOS revealed that this multi-protein complex is ancestrally  
67 present in all eukaryotes and predates the origin of mitochondria (Muñoz-Gómez et al. 2015; Huynen  
68 et al. 2016). The central and scaffolding subunit of the MICOS complex, the Mic60 protein, traces  
69 back to the *Alphaproteobacteria*, the group from which mitochondria descended. Indeed, Mic60  
70 serves as a phylogenetic marker that is uniquely present in the *Alphaproteobacteria* and the  
71 mitochondrial lineage<sup>2</sup>. While only the C-terminal signature mitofilin domain of Mic60 is sufficiently  
72 conserved at the sequence level, the overall predicted secondary structure of Mic60 has also been  
73 conserved in both mitochondrial and alphaproteobacterial homologs<sup>19</sup>. In addition to having  
74 homologues of Mic60, many alphaproteobacteria also develop either lamellar or vesicular  
75 intracytoplasmic membranes (ICMs) that house diverse electron transport chains involved in  
76 methanotrophy, nitrification, and anoxygenic photosynthesis<sup>21-25</sup>. This raises the possibility that  
77 Mic60 is involved in the development and/or stability of ICMs in alphaproteobacteria, and that  
78 mitochondrial cristae evolved from ancestral alphaproteobacterial ICMs<sup>26</sup>. Support for the functional  
79 conservation of alphaproteobacterial Mic60 comes from its capacity to bind and bend membranes *in*  
80 *vitro* and heterologously in the gammaproteobacterium *Escherichia coli*<sup>27</sup>. However, the precise role  
81 of Mic60 has not yet been directly studied in alphaproteobacteria, and thus the evolutionary  
82 relationship between cristae and ICMs remains unknown.

83 Though early ideas linked cristae to ICMs based simply on morphological resemblance, the  
84 iconography of the field (i.e., the aggregate of scientific diagrams) has mostly depicted cristae as  
85 post-endosymbiotic adaptations of mitochondria<sup>26</sup>. To better understand the function of Mic60 in  
86 alphaproteobacteria and the origin of mitochondrial cristae, we investigated the role of *mic60*, and its  
87 adjacent gene *orf52*, in two distantly related purple alphaproteobacteria: the vesicular ICM-developing  
88 *Rhodobacter (Cereibacter) sphaeroides (Rhodobacterales)* and lamellar ICM-developing  
89 *Rhodospseudomonas palustris (Rhizobiales)*. We first explored the genomic context, large-scale  
90 phylogenetic distribution, and sequence and structural conservation of alphaproteobacterial Mic60  
91 homologues. We then experimentally investigated the effects of the disruption and overexpression of  
92 Mic60 and Orf52 in photoheterotrophic growth and ICM development. Finally, we assessed the  
93 higher-order assembly and physical interactors of alphaproteobacterial Mic60 and Orf52.

## 94 **Results**

### 95 Alphaproteobacterial *mic60* is clustered with a syntenic neighboring gene, *orf52*

96 A survey of the genomic context of *mic60* in several alphaproteobacterial species revealed that *mic60*  
97 is genetically linked to genes involved in the heme biosynthesis pathway<sup>20</sup>. In most  
98 alphaproteobacterial genomes, *mic60* is downstream of *hemC* (hydroxymethylbilane synthase;  
99 HMBS) and *hemD* (uroporphyrinogen-III synthase; UROS), and upstream of a hypothetical protein-  
100 coding gene sometimes misannotated as *hemY*. All four genes have the same orientation and are  
101 usually tightly clustered with little intergenic space in between them, which may suggest that they are  
102 functionally related or co-transcribed as part of the same operon. This is consistent with the regulatory



103 requirements of Mic60 according to its hypothesized function in ICM development, which requires  
104 heme biosynthesis for the proper assembly of cytochromes<sup>26</sup>. Indeed, HemD is occasionally fused to  
105 Mic60 in members of the *Rhodospirillales*, *Kiloniellales*, and *Rhizobiales* (Fig. 1A)<sup>20</sup>. In the yeast *S.*  
106 *cerevisiae*, the MICOS complex has been reported to interact with the enzyme ferrochelatase (HemH  
107 in alphaproteobacteria) which catalyzes the insertion of ferrous iron into protoporphyrin IX, the eighth  
108 and final step in heme biosynthesis<sup>28</sup>.

109 Although *hemC* and *hemD* are genuine enzymes of the heme biosynthesis pathway, the gene  
110 downstream of *mic60* clearly does not encode a heme biosynthetic enzyme. This protein is usually  
111 misannotated as HemY because it contains a conserved hemY\_N domain (PF07219) at its N-  
112 terminus. Confusingly, this domain is unrelated to genuine *hemY* (protoporphyrinogen IX oxidase),  
113 which is rather uncommon among alphaproteobacteria. Instead of *hemY*, most alphaproteobacteria  
114 use the product of *hemJ* to synthesize protoporphyrin IX (very few alphaproteobacteria have a  
115 genuine *hemY* gene homologous to that of *E. coli* and *Bacillus subtilis*)<sup>29</sup>. Here, the protein encoded  
116 by the gene downstream of *mic60* will be referred to as Orf52 based on its predicted size of 52 kDa in  
117 *R. sphaeroides* 2.4.1. Like alphaproteobacterial Mic60, Orf52 is an integral membrane protein, but it  
118 possesses two transmembrane segments instead of one at its N-terminus, and seems to expose its  
119 bulk to the periplasmic space. Moreover, Orf52 contains several tetratricopeptide repeat motifs, which  
120 are usually involved in protein-protein interactions and found in proteins that are part of multiprotein  
121 complexes. In *R. sphaeroides*, the *mic60*–*orf52* gene pair is co-transcribed as indicated by a  
122 transcription start site (TSS) in the intergenic region between *hemD* and *mic60*<sup>30</sup> (Fig 2A). In the  
123 magnetosome gene island (MAI) of *Magnetospirillum gryphiswaldense*, *mic60* and *orf52* are also co-  
124 transcribed separately from their neighboring genes<sup>31</sup>. The conserved motif order and composition of  
125 Mic60 and Orf52, as well as their transcriptional coupling, indicate that these proteins have structural  
126 roles and may physically interact with each other at alphaproteobacterial envelopes.

#### 127 Mic60 and Orf52 have broad phylogenetic distributions that overlap with the distribution of ICMs in the 128 Alphaproteobacteria

129 Prokaryotic homologs of Mic60 have been previously shown to be restricted to alphaproteobacterial  
130 species, thus serving as a synapomorphy for the clade that comprises both mitochondria and the  
131 *Alphaproteobacteria*<sup>19,20,2</sup>. Moreover, phylogenetically diverse alphaproteobacteria are known to  
132 develop extensive bioenergetic ICMs that house electron transport chains associated with  
133 physiological processes such as methanotrophy (methane oxidation), nitrification (nitrite oxidation),  
134 and (aerobic or anaerobic) anoxygenic photosynthesis<sup>21–23,26,24</sup>. However, it is unclear to what extent  
135 the presence of Mic60, which has been hypothesized to be involved in ICM development<sup>26</sup>, correlates  
136 with the occurrence of ICMs. To better understand the evolutionary relationship between Mic60 and  
137 ICMs, we investigated their large-scale phylogenetic distributions in the *Alphaproteobacteria*. To do  
138 this, we searched the GTDB R207 database that currently comprises more than 7,684  
139 alphaproteobacterial genomes, with profile Hidden Markov Models (pHMMs) for Mic60, Orf52, and  
140 markers for ICM-associated physiologies (Fig. 1B).

141 These analyses show that both Mic60 and Orf52 have a broad and dense phylogenetic distribution  
142 that encompasses the much more sporadic distribution of reported ICMs in the *Alphaproteobacteria*  
143 (Fig. 1B). Methanotrophy and nitrite oxidation are restricted to a very few genera (e.g., *Methylocella*,  
144 *Methylosinus*, and *Methylocystis*, and *Nitrobacter*), whereas photoautotrophy (or the capacity to  
145 harvest light's energy to fix carbon dioxide) is phylogenetically widespread (Fig. 1B). The presence of  
146 these ICM-associated physiologies largely overlaps with those species reported to develop extensive  
147 ICMs (Fig. 1B). Furthermore, the prediction of a photoautotrophic physiology in several species not  
148 yet studied ultrastructurally suggests that these may also develop extensive ICMs. On the other hand,  
149 phototrophs (represented by aerobic anoxygenic photoheterotrophs) have a much broader  
150 phylogenetic distribution<sup>32</sup> (Fig. 1B), though they are not often associated with the presence of  
151 extensive ICMs. It is known, however, that aerobic anoxygenic phototrophs can develop less  
152 conspicuous ICMs under some environmental conditions<sup>33</sup>. Altogether, these phylogenetic patterns  
153 suggests that both Mic60 and Orf52 are ancestrally present in the *Alphaproteobacteria* and are  
154 required by extant species that either have or lack the capacity to develop ICMs.

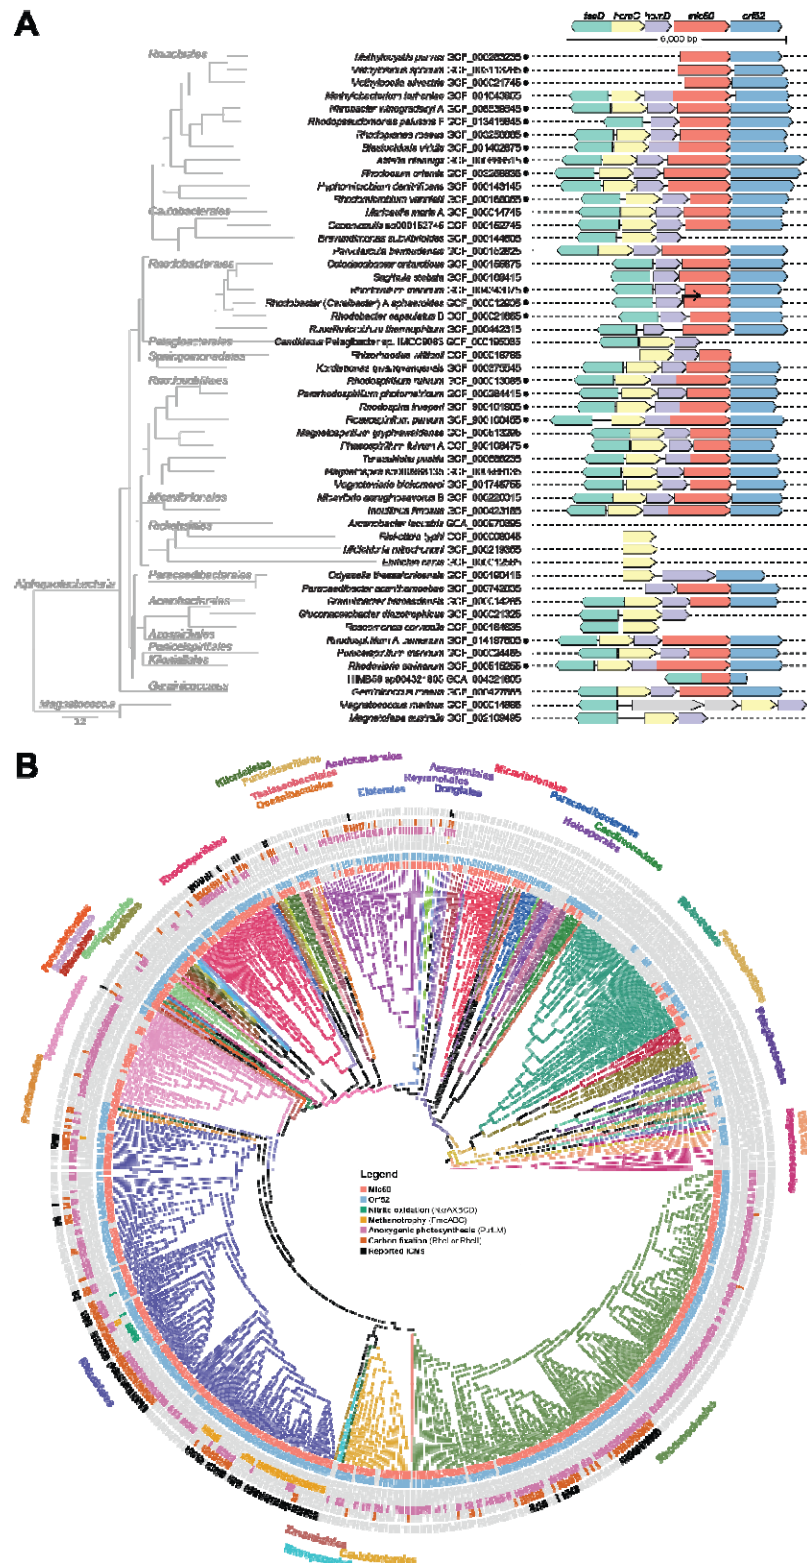

155

156 **Figure 1. Genomic context of *mic60* and phylogenetic distribution of Mic60, Orf52, and ICMs across the**  
 157 ***Alphaproteobacteria*. A.** The genomic context for *mic60* in representative ICM-developing alphaproteobacteria  
 158 and their relatives. Black circles to right of species identifiers denote alphaproteobacteria that develop extensive  
 159 ICMs. The bent arrow denotes the TSS in *R. sphaeroides*. Representative taxa were selected manually and a  
 160 supermatrix of 117 single-copy marker genes was assembled with GToTree<sup>34</sup>. The compositional heterogeneity

161 of the supermatrix was decreased with L trimmer and a phylogenetic tree was inferred with IQ-TREE and the  
162 LG+C60+F+G4 model<sup>35</sup>. **B.** A comprehensive phylogenetic tree of the *Alphaproteobacteria* that displays the  
163 distributions of Mic60, Orf52, markers for ICM-associated physiologies, and reported ICMs across a maximally  
164 diverse set of taxa down sampled from the GTDB R207 database<sup>36</sup>. A supermatrix of single-copy marker genes  
165 was assembled with GTDB-Tk, a phylogenetic tree was inferred with IQ-TREE (-fast mode), and the longest-  
166 branching taxa were identified and removed with TreeShrink<sup>37</sup>. The down sampling was performed with  
167 Treemmer<sup>38</sup> and constrained in such a way that all taxa with ICMs and ICM-associated physiologies were  
168 retained. TreeViewer was used to display the phylogenetic distributions of traits on the tree. Protein searches  
169 were performed with hmmsearch of the HMMER suite using both Pfam and custom pHMMs<sup>39</sup>.

#### 170 The predicted secondary and tertiary structure of alphaproteobacterial Mic60 is conserved

171 Previous studies have shown that the overall predicted secondary structure of Mic60 is conserved  
172 both in eukaryotes and alphaproteobacteria<sup>19,20</sup>. In the former, Mic60 consists of an N-terminal pre-  
173 sequence (a targeting signal to the mitochondrion), followed by a transmembrane segment, a central  
174 region with coiled-coils, and a C-terminal signature mitofilin domain. The same motifs and domains  
175 are found in the same order in the alphaproteobacterial Mic60 homolog, except for the N-terminal pre-  
176 sequence which is missing, as expected. Recently, mitochondrial Mic60 has been shown to deform  
177 membranes, and thus likely to introduce curvature at crista junctions<sup>40,27</sup>. This membrane-deforming  
178 capability depends on a lipid-binding site (LBS) that is found in between the central coiled-coils and  
179 the C-terminal mitofilin domain. This LBS comprises two  $\alpha$ -helices (LBS1 and LBS2), the first of which  
180 is amphipathic and presumably inserts itself into the mitochondrial inner membrane<sup>40</sup>. LBS1 is  
181 extremely important for the function of Mic60 as its removal or mutation leads to the loss of  
182 membrane binding and deformation, and also to phenotypes quite similar to those obtained when the  
183 entire *MIC60* gene is deleted in *S. cerevisiae*<sup>40</sup>.

184 To investigate whether the membrane-bending  $\alpha$ -helices of eukaryotic Mic60 are present in its  
185 alphaproteobacterial homologs, we first performed pHMM-sequence searches against the UniProtKB  
186 database. We also predicted the secondary structures of both eukaryotic and alphaproteobacterial  
187 Mic60 homologs with JPred4<sup>41</sup>. A detailed inspection of both the alignments and predicted secondary  
188 structures revealed that alphaproteobacterial Mic60 has retained the two  $\alpha$ -helices that comprise the  
189 LBS of eukaryotic Mic60 (Fig. 2A). Helical wheel projections further show that LBS1 is amphipathic in  
190 both *R. sphaeroides* and *R. palustris* (Fig. 2B, C). In addition, the functionally critical amino acid  
191 position Phe573 in the yeast *Chaetomium thermophilum*<sup>40</sup> is largely conserved among  
192 alphaproteobacteria (e.g., Phe327 in *R. sphaeroides*; see Fig. 2A).

193 Next, we predicted the tertiary structure of the Mic60 homologs of the yeast *Lachancea*  
194 *thermotolerans*, whose crystal structure was recently partially solved<sup>42</sup>, and the alphaproteobacteria  
195 *R. sphaeroides* and *R. palustris* using AlphaFold2 (Fig. S1A-D). The predicted structures confirm the  
196 presence of the two  $\alpha$ -helices (LBS) in the linker region between the central coiled-coils and the C-  
197 terminal mitofilin domain (Fig. S1A-D). Furthermore, the predicted structures show that the three  
198 conserved  $\alpha$ -helices that comprise the mitofilin domain of eukaryotic Mic60 ( $\alpha$ 1-3M), as well as the  
199 last two small  $\alpha$ -helices of the central coiled-coil region ( $\alpha$ 2-3C), are also present in  
200 alphaproteobacterial Mic60 (Fig. S1A-D). Structural alignments reveal that the C-terminal region of  
201 alphaproteobacterial Mic60 (i.e., LBS+mitofilin) largely overlap with that of its eukaryotic homolog (Fig.  
202 1D, E). The major structural differences between eukaryotic and alphaproteobacterial Mic60  
203 homologs are that the former is, on average, a longer protein with a larger segment of central coiled  
204 coils, and has a transmembrane segment much closer to the N-terminus of the protein (Fig. S1A-D).  
205 The agreement between the predicted AlphaFold2 structure with high-confidence pLDDT scores and  
206 the partially experimentally solved structure at amino acids 207-382<sup>42</sup> suggests that eukaryotic Mic60  
207 indeed folds into a long  $\alpha$ 1C helix (Fig. S1B). On the other hand, alphaproteobacterial Mic60 may  
208 similarly have a long  $\alpha$ 1C helix, but the lower pLDDT scores in this region of the predicted AlphaFold2  
209 structure make it currently uncertain (Fig. S1D). In summary, the above observations indicate that  
210 alphaproteobacteria Mic60 (1) has a largely conserved secondary and tertiary structure relative to  
211 eukaryotic Mic60, and (2) contains a conserved amphipathic LBS1 helix that likely aids in membrane-  
212 binding and -bending, as demonstrated *in vitro* for its eukaryotic ortholog<sup>27,40</sup>.



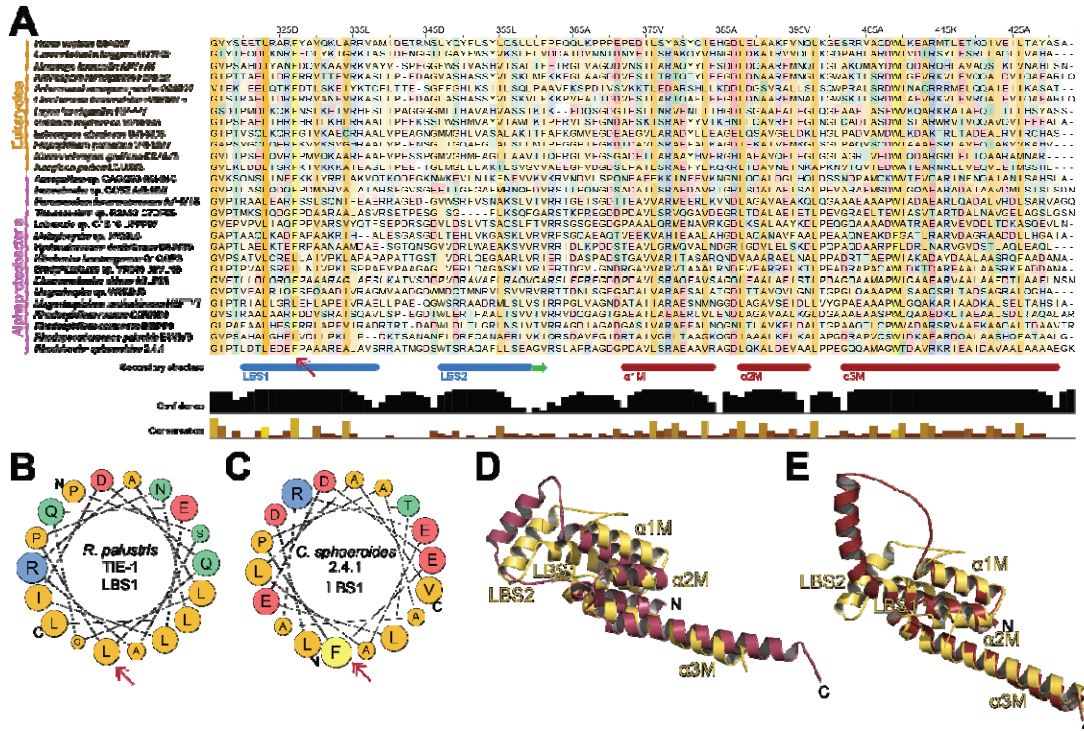

213

214 **Figure 2. Evolutionary conservation of the secondary and tertiary structure of mitochondrial and**  
 215 **alphaproteobacterial Mic60. A.** Alignment of C-terminal signature mitofilin domain and its adjacent N-terminal  
 216 region of representative alphaproteobacteria and eukaryotes. This alignment has the Mic60 amino acid sequence  
 217 of *R. sphaerooides* as a reference and was obtained from JPred4<sup>41</sup>. The amino acid colors follow a coloring  
 218 scheme based on physicochemical properties, and the intensity of the color reflect evolutionary conservation of  
 219 the site in the alignment. The red arrow points to the conserved Phe327 in the *R. sphaerooides* Mic60 homolog.  
 220 Common gaps are hidden from the alignment as per JPred4 output. **B.** Helical wheel projection of the  
 221 amphipathic helix that comprises LBS1 in *R. palustris* as predicted by the HELIQUEST web server<sup>43</sup>. **C.** Helical  
 222 wheel projection of the amphipathic helix that comprises LBS1 in *R. sphaerooides* predicted as in **B**. **D.** Structural  
 223 alignment of the C-terminal region of Mic60 homologs from the eukaryote *L. thermotolerans* (yellow) and the  
 224 bacterium *R. palustris* (pink). **E.** Structural alignment of the C-terminal region of Mic60 homologs from the  
 225 eukaryote *L. thermotolerans* (yellow) and the bacterium *R. sphaerooides* (red). See Fig. S1 for AlphaFold2  
 226 structure predictions of the entire protein sequences.

227 Knock out of *mic60* and *orf52* significantly affects photoheterotrophic growth in *R. sphaerooides* and *R.*  
 228 *palustris*

229 Purple alphaproteobacteria develop extensive intracellular membranes (ICM) in the presence of light  
 230 and the absence of oxygen<sup>21,44,22</sup>. These ICMs house the photosynthetic apparatus and electron  
 231 transport chain, which is generally composed of light-harvesting complexes 1 and 2 (LH1 and LH2), a  
 232 type II reaction center (RC), a cytochrome *bc*<sub>1</sub>, a periplasmic cytochrome *c*<sub>2</sub>, and an ATP synthase<sup>45</sup>.  
 233 By means of cytochrome *bc*<sub>1</sub>, which is also shared with the respiratory chain, the photosynthetic chain  
 234 creates a proton motive force across the ICM that is harvested by the ATP synthase to produce ATP  
 235<sup>22</sup>. ICMs are often continuous with, but sometimes detached from<sup>46</sup>, the cytoplasmic membrane (CM)  
 236<sup>47</sup>, just as cristae are continuous with the mitochondrial inner membrane. In *S. cerevisiae*  
 237 mitochondria, the disruption of Mic60 leads to functional defects such as decreased growth rate under  
 238 respiratory conditions (i.e., non-fermentable media) and increased production of oxygen radicals<sup>48,49</sup>.  
 239 If Mic60 is involved in the development of photosynthetic ICMs, then its disruption should lead to  
 240 growth defects in the absence of oxygen and the presence of light (i.e., photosynthetic conditions).

241 To assess whether Mic60 and Orf52 have an impact on photoheterotrophic growth and ICM  
 242 development, we first knocked out these genes in two phylogenetically distant purple  
 243 alphaproteobacteria amenable to reverse genetics, *R. sphaerooides* and *R. palustris*<sup>50,51</sup>. To create  
 244 knockout strains, suicide plasmids containing the knockout gene construct flanked by homologous



245 stretches were transferred into both species via conjugation using a suitable *E. coli* strain. After  
 246 selection and counter-selection for a first and second recombination events (to respectively insert and  
 247 excise the suicide plasmid into the host genome), these knockout strains ( $\Delta mic60$  and  $\Delta orf52$ ) were  
 248 confirmed by PCR assays using several sets of internal and external primers that flank the knockout  
 249 gene construct junctions (Fig. S2A-B).

250 Under chemoheterotrophic conditions (i.e., absence of light and presence of oxygen), purple  
 251 alphaproteobacteria do not develop photosynthetic ICMs for light harvesting. Our data show that there  
 252 are no growth differences between  $mic60^+ orf52^+$  wild type (WT) and the  $\Delta mic60$  and  $\Delta orf52$  strains  
 253 under these conditions (Fig. S3A). On the other hand, these bacteria develop a moderate amount of  
 254 ICMs under anoxia and high light intensity. The  $\Delta mic60$  strains had a slower photoheterotrophic  
 255 growth rate relative to WT in both *R. sphaeroides* and *R. palustris* (Fig. 3A, 3C). Under these  
 256 conditions, the  $\Delta orf52$  decreased photoheterotrophic growth significantly in *R. palustris* but not in *R.*  
 257 *sphaeroides*. Under anoxia and low light intensity, purple alphaproteobacteria upregulate the LH2  
 258 complex and develop even larger amounts of ICMs to increase light capturing. As expected, both  
 259  $\Delta mic60$  and  $\Delta orf52$  strains displayed even slower photoheterotrophic growth rates in both *R.*  
 260 *sphaeroides* and *R. palustris* in low light, when ICM development increases (Fig. 3B, 3D). Interestingly,  
 261  $\Delta orf52$  displayed much more severe decreases in growth rate, and even lower yield at stationary  
 262 phase, than  $\Delta mic60$  in *R. palustris* (Fig. 3B). This is opposite from what was observed in *R.*  
 263 *sphaeroides* (Fig. 3D) and indicates that these proteins might contribute differently to  
 264 photoheterotrophic growth in these two distantly related species. In summary, the slower  
 265 photoheterotrophic growth rate of the knockout strains, especially under low light when larger  
 266 amounts of ICMs are required, suggests that both Mic60 and Orf52 affect the development of  
 267 photosynthetic ICMs.

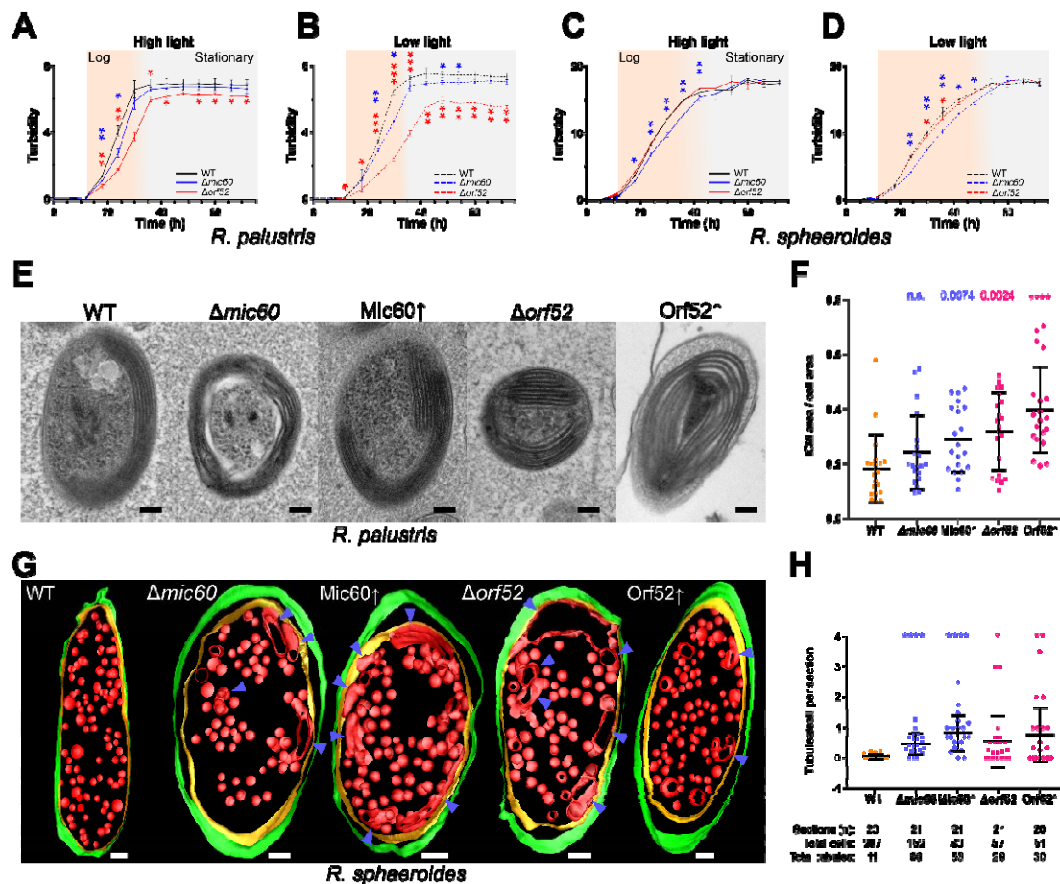

268

269 **Figure 3. The disruption of the *mic60* and *orf52* genes causes defects in photoheterotrophic growth and**  
 270 **ICM development. A-D.** Growth curves of *R. palustris* WT and  $\Delta mic60$  and  $\Delta orf52$  strains under high (A) and

271 low (B) light and *R. sphaeroides* under high (C) and low (D) light. Turbidity was measured at 565 nm and  
272 expressed in arbitrary units given on the *y*-axis. Time points are expressed in hours on the *x*-axis. Growth stages  
273 are color-coded according to the labels at the top. Colored asterisks show statistical significance of differences at  
274 each time point between WT and either  $\Delta mic60$  (blue) or  $\Delta orf52$  (red). E. Exemplar TEM micrographs of each *R.*  
275 *palustris* strain grown in low light. F. Column scatter plot of the ratio of *R. palustris* ICM area/whole cell area (*y*-  
276 axis) measured from 20 cells imaged using TEM in *R. palustris* WT, knockout ( $\Delta mic60$  and  $\Delta orf52$ ) and  
277 overexpression (Mic60 $\uparrow$  and Orf52 $\uparrow$ ) strains. Mean and standard deviation shown by middle bar and whiskers,  
278 respectively. Values and asterisks above each column represent statistical significance of the difference of each  
279 population in comparison to WT. G. Exemplar electron tomograms of each *R. sphaeroides* strain grown in low  
280 light. Blue arrows point at aberrant ICMs. H. Column scatter plot of tubules/cell per section (*y*-axis) for *R.*  
281 *sphaeroides* WT, knockout ( $\Delta mic60$  and  $\Delta orf52$ ) and overexpression (Mic60 $\uparrow$  and Orf52 $\uparrow$ ) strains. The number of  
282 sections, cells and tubules for each cell lines are given in the table below the *x*-axis. Mean and standard deviation  
283 shown by middle bar and whiskers, respectively. Asterisks above each column represent statistical significance  
284 of the difference of each mutant population in comparison to WT. Related to Movie S1-S4. Scale bars in (E) and  
285 (G), 100 nm. Statistical significance: \*,  $P < 0.05$ ; \*\*,  $P < 0.01$ ; \*\*\*,  $P < 0.001$ ; \*\*\*\*,  $P < 0.0001$ . See also Fig. S1-3.

## 286 Mic60 and Orf52 are involved in the formation of lamellar and vesicular ICMs

287 The disruption of mitochondrial Mic60 leads to structural defects such as the loss of crista junctions,  
288 the detachment of cristae from the mitochondrial envelope, and elongated crista membranes<sup>52,18</sup>.  
289 Hypotheses about the role of Mic60 in ICM development postulate that this protein might be  
290 responsible for creating ICM junctions and contact sites that respectively compartmentalize ICMs and  
291 anchor them to the bacterial envelope<sup>26</sup>. The loss and overexpression of Mic60 and Orf52 from ICM-  
292 developing alphaproteobacteria might thus lead to morphological defects in ICMs.

293 To directly address whether the gene products of *mic60* and *orf52* are involved in ICM formation, we  
294 generated *R. palustris* and *R. sphaeroides* strains capable of overexpressing Mic60 and Orf52  
295 (Mic60 $\uparrow$  and Orf52 $\uparrow$ , respectively). These strains were verified by reverse transcription quantitative  
296 PCR (RT-qPCR) upon induction for six hours with 1 mM isopropyl- $\beta$ -D-thiogalactoside (IPTG). Both  
297 Mic60 $\uparrow$  and Orf52 $\uparrow$  strains had an increase in gene expression of  $\sim 7$ – $9$ -fold in *R. sphaeroides*, and of  
298 about two-fold in *R. palustris*, relative to ex-conjugants grown in the absence of IPTG (Fig. S1C). The  
299 knockout and WT strains were grown under photoheterotrophic conditions and low light, and were  
300 IPTG-induced for six hours (in case of overexpression ex-conjugants) to maximize ICM development.  
301 After harvesting, the strains were cryopreserved, contrasted, and imaged using transmission electron  
302 microscopy (TEM). Randomized TEM micrographs were blindly scored to quantitatively evaluate  
303 phenotypes associated to the peripheral stacked lamellar ICMs of *R. palustris* and the uniformly  
304 distributed vesicular ICMs of *R. sphaeroides*<sup>24</sup> (Fig. 3E-H, Movie S1-4).

305 In *R. palustris*, the area occupied by the lamellar ICMs increased relative to the whole cell area in  
306 both knockout ( $\Delta mic60$  and  $\Delta orf52$ ) and overexpression (Mic60 $\uparrow$  and Orf52 $\uparrow$ ) strains, as compared to  
307 the WT (ratio ICM area/cell area =  $0.18 \pm 0.03$ ) (Fig. 3E-F). This increase was statistically significant in  
308 Mic60 $\uparrow$  ( $0.29 \pm 0.03$ ) but not in  $\Delta mic60$  ( $0.24 \pm 0.03$ ). Both  $\Delta orf52$  ( $0.32 \pm 0.03$ ) and Orf52 $\uparrow$  ( $0.40 \pm 0.04$ )  
309 demonstrated higher and statistically significant increases in ICM:cell area ratios when compared to  
310 their Mic60 counterparts. In *R. sphaeroides*, we scored for the appearance of elongated ICMs (i.e.,  
311 tubules) per cell as these were rarely observed in the WT strain (tubules/cell/section =  $0.04 \pm 0.02$ ) (Fig  
312 3G-H). Both  $\Delta mic60$  ( $0.46 \pm 0.07$ ) and Mic60 $\uparrow$  ( $0.82 \pm 0.13$ ) showed a statistically highly significant  
313 increase in the number of tubules, whereas these structures were observed to a lesser extent in  
314  $\Delta orf52$  ( $0.54 \pm 0.19$ ) and Orf52 $\uparrow$  ( $0.74 \pm 0.20$ ); the most conspicuous outliers ( $\geq 3$  tubules/cell/section)  
315 were observed in the latter cells. Moreover, among tubulated ICMs, Mic60 $\uparrow$  displayed a significantly  
316 higher incidence of branching ICMs relative to  $\Delta mic60$  (Fig. S4), reminiscent of the branched cristae  
317 seen in *S. cerevisiae* MIC60 $\uparrow$ <sup>52</sup>. Electron tomograms were used to render representative images for  
318 *R. sphaeroides* cells whose ICM membranes were not well contrasted (Fig 3G, Movie S1-4). This  
319 revealed the presence of elongated ICMs of various lengths and volumes in all the mutant strains  
320 assayed.

321 The ultrastructural defects of the  $\Delta mic60$  and  $\Delta orf52$  strains of *R. sphaeroides* and *R. palustris* are  
322 consistent with their lower photoheterotrophic growth dynamics. Namely, the  $\Delta orf52$  strain exhibits  
323 more pronounced phenotypes than the  $\Delta mic60$  strains in *R. palustris*, whereas the opposite is true in  
324 *R. sphaeroides*. These defects in ICM area and shape were not paralleled by the absorbance spectra

325 of whole-cell protein extracts in *R. palustris* which suggests that the regulation of RC-LH1 and LH2  
326 complexes is largely unaffected (Fig. S3B-C). We also observed that both the knockout and  
327 overexpression strains led to ICM area expansion. It is possible that both the disruption and  
328 overproduction of Mic60 lead to unregulated membrane growth that, under the image analyses  
329 employed here, produce seemingly similar phenotypes. However, improved sample preservation and  
330 larger-scale volumetric electron microscopy will be required to quantitatively assess changes in the  
331 shape and number of ICM junctions, which potentially differ between knockout and overexpression  
332 strains. The expansion of photosynthetic ICMs is similar to the enlarged respiratory cristae observed  
333 in *S. cerevisiae* and *T. brucei* mitochondria defective of Mic60, and to the enlarged magnetosomes  
334 reported in the magnetotactic alphaproteobacterium *M. gryphiswaldense* upon deletion of the *mic60*  
335 paralog found within the magnetosome gene island (see Discussion). Together, the ultrastructural  
336 defects displayed by both  $\Delta mic60$  and  $\Delta orf52$  suggest that these genes are involved in the  
337 development of photosynthetic ICMs in purple alphaproteobacteria.

### 338 Mic60 and Orf52 are assembled into a 250 kDa complex in the ICMs of *R. sphaeroides*

339 Eukaryotic MICOS comprises 6-9 subunits in *H. sapiens*, *S. cerevisiae*, and *T. brucei*. Four of them,  
340 namely Mic60, Mic10, Mic19 and Mic12, are inferred to have been ancestral to eukaryotes<sup>19,20</sup>.  
341 Furthermore, the MICOS complex has been suggested to engage in interactions with a myriad of  
342 other proteins, such as the outer membrane  $\beta$ -barrel insertase Sam50, the outer membrane  
343 translocase Tom40, and the mitochondrial intermembrane space assembly protein Mia40<sup>13,53</sup>. It is  
344 thus possible that alphaproteobacterial Mic60 and Orf52 are part of a larger multi-protein complex at  
345 alphaproteobacterial envelopes.

346 To investigate whether Mic60 and Orf52 form part of a multi-protein complex, *R. sphaeroides* was  
347 conjugated with a suitable *E. coli* strain for the transfer of plasmids that allow the IPTG-inducible  
348 expression of either Mic60 or Orf52 bearing a C-terminal hexa-histidine (6xHis) tag. The expression of  
349 Mic60-6xHis and Orf52-6xHis was verified by Western blot analysis using anti-6xHis antibodies (Fig.  
350 4A). Mic60-6xHis was found to migrate as a ~62 kDa protein, in contrast to its theoretical 43.8 kDa  
351 molecular weight; this is likely explained by the anomalous mobility of acidic proteins in SDS-PAGE<sup>54</sup>.  
352 The two overexpression strains, i.e., Mic60-6xHis $\uparrow$  and Orf52-6xHis $\uparrow$ , alongside the Mic60<sup>+</sup>Orf52<sup>+</sup>  
353 (WT) control strain, were disrupted by high pressure homogenization to allow for ICM isolation (i.e.,  
354 chromatophores) by differential centrifugation. The absorption spectra of the isolated ICMs from each  
355 strain were essentially identical, which indicates that the overexpression of Mic60-6xHis and Orf52-  
356 6xHis does not affect the RC-LH1:LH2 protein composition ratio of ICMs (Fig. 4B).

357 The isolated ICMs were resolved in blue native PAGE (BN-PAGE) gels and transferred onto a  
358 membrane for probing with an anti-His antibody (Fig. 4C). Both Mic60-6xHis and Orf52-6xHis  
359 incorporate into a ~250 kDa multi-protein complex, with the antibody signal absent from the WT lane.  
360 Notably, the immunoreactive ~250 kDa-sized band seems to correspond to a faint and similarly sized  
361 Coomassie-stained band in the BN-PAGE gel. To identify proteins migrating in this region of the BN-  
362 PAGE gel, four ~250 kDa bands were excised from *R. sphaeroides* WT and the proteins eluted and  
363 analyzed by liquid chromatography-tandem mass spectroscopy (LC-MS/MS) (Fig. S2A). Mic60 and  
364 Orf52 were found among the 175 top proteins in the ~250 kDa band with a mean intensity score >23  
365 in all four independent biological replicates (Dataset 1). The top-three hits corresponded to the RC  
366 complex subunits H, M, and L, which were previously shown to co-migrate with Mic60 in the BN-  
367 PAGE gels<sup>55</sup>. These data are consistent with both Mic60 and Orf52 previously being detected in  
368 isolated ICMs and/or in their developmental precursors, i.e., 'upper pigmented bands' (UPB)<sup>55,56</sup>.  
369 These experiments thus show that both Mic60 and Orf52 are part of a higher-order assembly complex  
370 of ~250 kDa present in photosynthetic ICMs.

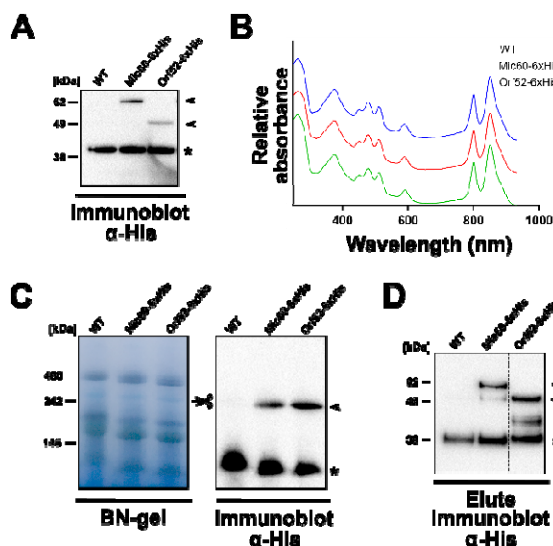

371

372 **Figure 4. Mic60 and Orf52 assemble into a 250 kDa protein complex in *R. sphaeroides*.** **A.** Immunoblot  
 373 verifying the expression of Mic60-6xHis and Orf52-6xHis. **B.** Absorption spectra (~280-950 nm scan, x-axis) of  
 374 ICMs isolated from Mic60-6xHis, Orf52-6xHis, and WT control strains. Relative absorbance given on y-axis and  
 375 spectra are normalized to the bacteriochlorophyll a Qx peak at 590 nm. Spectra are stacked on top of each other  
 376 and color-coded according to the legend on the upper right-hand corner. **C.** Protein complexes from detergent-  
 377 solubilized isolated ICMs as resolved by BN-PAGE. Scissor symbol indicates the ~250 kDa band excised for MS  
 378 analysis on left gel (see also Fig. S3A and Dataset 1). Right gel shows immunoblot demonstrating that Mic60-  
 379 6xHis and Orf52-6xHis assemble into a ~250 kDa band. **D.** Immunoblot of Mic60-6xHis and Orf52-6xHis AP  
 380 eluates showing that the 6xHis-tagged bait proteins were successfully purified from detergent-solubilized isolated  
 381 ICMs. For **A**, **C**, and **D**, molecular weight markers shown on left. All immunoblots use arrows to point at specific  
 382 antibody signals from Mic60-6xHis and Orf52-6xHis (absent for WT) controls whereas asterisks denoted non-  
 383 specific band used as loading control.

#### 384 Mic60 and Orf52 interact with the outer membrane $\beta$ -barrel insertase BamA

385 Among several interactions reported for the eukaryotic MICOS complex (e.g., with Tom40, Sam50,  
 386 Mia40), it was suggested that the Mic60-Sam50 interaction may have predated the origin of  
 387 mitochondria<sup>53</sup>. This interaction is required for making contact sites at the mitochondrial envelope of  
 388 phylogenetically disparate eukaryotes such as *H. sapiens*, *S. cerevisiae*, and *T. brucei*<sup>15,16,18</sup>, and the  
 389 bacterial homolog of Sam50, BamA, is a ubiquitous protein of bacteria surrounded by two membranes  
 390 (diderms). In these bacteria (e.g., *Proteobacteria*), BamA is required for the assembly of  $\beta$ -barrels in  
 391 the outer membrane<sup>57-59</sup>. Furthermore, *mic60* is genetically linked to *orf52* and co-transcribed as part  
 392 of the same operon<sup>30</sup>. These observations and inferences prompted us to next investigate potential  
 393 physical interactors of alphaproteobacterial Mic60 (YP\_351551.1) and Orf52 (YP\_351550.1).

394 We isolated ICMs from *R. sphaeroides* and performed affinity purifications (AP) of Mic60-6xHis and  
 395 Orf52-6xHis. The ICMs were solubilized with a mixture of digitonin (1.5% w/v) and Triton X-100 (0.1%  
 396 v/v), and the cleared lysate was incubated with cobalt-coated Dynabeads to capture the 6xHis-tagged  
 397 baits. After extensive washing, the successful capture of Mic60-6xHis and Orf52-6xHis was confirmed  
 398 on a portion of beads taken for Western blot analysis with an anti-His antibody (Fig. 4D)—a mock AP  
 399 was done on *R. sphaeroides* WT as a control for non-specific binding. The remaining beads from  
 400 triplicate APs of Mic60-6xHis, Orf52-6xHis, and the mock controls were trypsinized and analyzed by  
 401 LC-MS/MS. Protein enrichment in bait-APs in comparison to the mock control was quantified using  
 402 label-free quantification as previously described<sup>60</sup>. In each AP, 497 high-confidence proteins were  
 403 found (Dataset 2) based on mean Andromeda confidence scores >100 in three biological replicates<sup>61</sup>.  
 404 Among these, proteins were considered to have true physical interaction if they (1) had Log<sub>2</sub>-  
 405 transformed fold-enrichment and p-values larger than three (Fig. 4A-B), (2) were part of the higher-  
 406 order ~250 kDa complex (see above; Dataset 1), (3) were previously reported in ICM and/or upper



407 pigmented bands (or UPBs, which are ICM precursors; Fig. 5C-D), and (4) were predicted to have  
408 transmembrane segments or a  $\beta$ -barrel structure (Fig. 5C-D).

409 The data show that both Mic60-6xHis and Orf52-6xHis interact with BamA (Fig. 5, S2), the  $\beta$ -barrel  
410 insertase subunit of the  $\beta$ -barrel assembly machine (BAM) complex<sup>59</sup>. Somewhat unexpectedly,  
411 Mic60-6xHis and Orf52-6xHis do not interact with each other, as neither protein was found to co-purify  
412 with either bait protein (Fig. 5A-B). We cannot rule out that the C-terminal 6x-His tag may have  
413 interfered with their interaction, although this is less likely due to its small size. Mic60 was also not  
414 found to interact with the enzyme HemD, although these proteins have fused in some  
415 alphaproteobacteria (Fig 2A)<sup>20</sup>. This was not unexpected as the HemD-Mic60 fusion protein is  
416 predicted to be membrane-anchored at its midpoint, having the HemD fragment exposed to the  
417 cytoplasm and Mic60 fragment on the periplasm. Moreover, the high degree of enrichment of Mic60  
418 relative to BamA (Fig 5B, 5D) is consistent with the idea that this protein engages in homotypic  
419 interactions and forms homooligomers as its eukaryotic counterparts<sup>40,48,42</sup>.

420 In contrast to Mic60, which exhibits a strong interaction solely with BamA, Orf52 also interacts with a  
421  $\beta$ -barrel protein annotated as Outer Membrane Efflux (OM Efflux) and a very small 4.8 kDa protein  
422 with an N-terminal TMD that is encoded by the RSP\_7517 locus (Fig. 5A, 5C; Fig. S3D). The former  
423 belongs to the TolC protein family and was found to be more abundant in ICM than the UBP precursor  
424<sup>56</sup>, whereas the latter is among the most enriched proteins in the Orf52 AP. The enrichment of  
425 RSP\_7515 is surprising as it was not previously detected in ICMs or UPBs (Jackson et al., 2012). It  
426 was, however, detected in the ~250 kDa BN-PAGE band, albeit below our defined threshold by a  
427 single peptide (Dataset 1). This may be explained by the fact that this protein is highly hydrophobic  
428 and would only yield two peptides by trypsinization, making it less amenable to detection by shotgun  
429 LC-MS/MS as employed above for the 250 kDa complex<sup>62</sup> (Fig. S3D). In conclusion, the Sam50  
430 homolog BamA appears to be the only physical interactor of alphaproteobacterial Mic60 (Fig. 5E), and  
431 this interaction has been conserved despite ~2 billion years of evolutionary divergence of modern  
432 alphaproteobacteria from mitochondria.

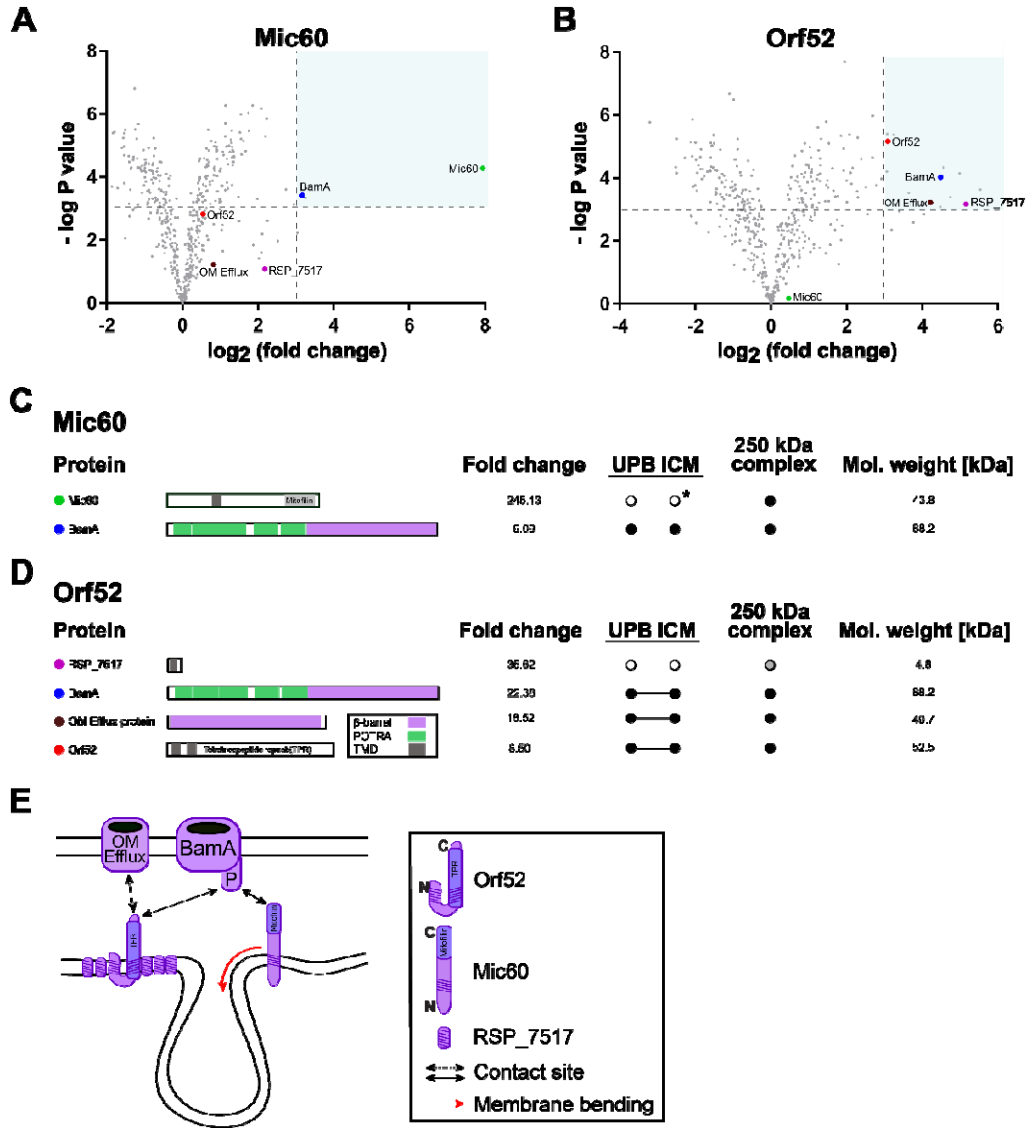

433

434 **Figure 5. The interactomes of Mic60 and Orf52 demonstrate that both proteins interact with the outer**  
 435 **membrane  $\beta$ -barrel protein BamA in *R. sphaeroides*.** A-B. Volcano plots of proteins identified by MS in AP  
 436 eluates of Mic60-6xHis (A) and Orf52-6xHis (B), with  $-\log P$ -values for each protein ( $y$ -axis) plotted against  $\log_2$ -  
 437 transformed fold-enrichment over WT negative control ( $x$ -axis); thresholds for each value for a protein considered  
 438 enriched interactors are indicated by dotted lines, demarking the shaded area of each plot. Baits and enriched  
 439 interactors are indicated by labelled and colored large dots, whereas other proteins are demarked by small, grey  
 440 dots. C-D. Summary of enriched interactors found in Mic60-6xHis (C) and Orf52-6xHis (D) APs showing the  
 441 same color scheme as in A and B. From the left of protein names: schemas depicting the domain architecture of  
 442 each interacting protein; its fold change in APs compared to WT negative controls; presence in upper pigmented  
 443 band (UPB) and ICM proteomes (Jackson et al., 2012); presence in  $\sim 250$  kDa band proteome (Dataset 1);  
 444 theoretical molecular (Mol.) weight. Black dots indicate presence in the proteome; grey dot indicates presence  
 445 below our defined threshold; \*, presence in ICM according to MS analysis of D'Amici *et al.* (2010). E. Schema of  
 446 Mic60 and Orf52 interactions in *R. sphaeroides*. Box contains a key with red arrow indicating an already *in vitro*  
 447 membrane-remodeling activity<sup>27</sup>. Related to Fig. S2 and Dataset 2.

#### 448 Discussion

449 The overarching aim of this study was to investigate the structure and function of alphaproteobacterial  
 450 Mic60, thereby testing the hypothesis that ICMs were transformed into cristae during the early  
 451 evolution of mitochondria<sup>26</sup>. To this end, we focused on two distantly related purple

452 alphaproteobacteria, *R. palustris* and *R. sphaeroides*. We showed that alphaproteobacterial Mic60 (1)  
453 has a conserved predicted tertiary structure and membrane-bending amphipathic helix, (2) affects  
454 photoheterotrophic growth and ICM development and shape, (3) is part of a higher-order 250 kDa  
455 multi-protein complex in photosynthetic ICMs, and (4) most likely physically interacts with the core  
456 BamA subunit of the outer membrane BAM complex. Furthermore, we also showed that Orf52 (whose  
457 gene is adjacent to in alphaproteobacteria but has no homologs in eukaryotes), also affects  
458 photoheterotrophic growth, ICM development and shape, and, although it does not interact with  
459 Mic60, also physically interacts with BamA.

460 These findings are consistent with previous observations and experiments that also support a  
461 functional conservation of Mic60 and its involvement in the development of both vesicular and  
462 lamellar ICMs. First, the expression profile of Mic60 follows the development of photosynthetic ICMs  
463 in the absence of oxygen and presence of light<sup>63</sup>. Second, Mic60 localizes to photosynthetic ICMs in  
464 three phylogenetically disparate alphaproteobacteria, *R. sphaeroides* (*Rhodobacterales*),  
465 *Rhodospirillum rubrum* (*Rhodospirillales*), and *R. palustris* (*Rhizobiales*)<sup>55,56,64,65</sup>, as indicated by the  
466 proteomes of isolated ICMs. Third, *R. sphaeroides*' Mic60 is capable of binding and tubulating  
467 membranes *in vitro*, and its heterologous overexpression induces ICM-like structures in *E. coli*<sup>27</sup>.  
468 Fourth, both *mic60* and *orf52* have paralogs in the magnetosome gene island of the  
469 alphaproteobacterial genus *Magnetospirillum* of the order *Rhodospirillales*<sup>19</sup> whose disruption leads  
470 to fewer and larger magnetosomes<sup>66,67</sup>. Multiple sources of evidence thus support the notion that the  
471 function of Mic60 has been conserved in alphaproteobacteria.

472 What is the precise role of Mic60 in ICM development? Mic60 likely introduces curvature at ICM  
473 junctions through an amphipathic helix that is conserved between mitochondria and  
474 alphaproteobacteria (see Fig. 2). That alphaproteobacterial Mic60 binds to and bend membranes has  
475 already previously been shown *in vitro*<sup>27</sup>. Moreover, alphaproteobacterial Mic60 most likely interacts  
476 with BamA, the central subunit of the BAM complex and homolog of Sam50, as shown in this study  
477 (Fig. 5). In mitochondria, Sam50 interacts with Mic60 through its intermembrane space-protruding  
478 POTRA domains, and it is likely that the same type of interaction occurs in the periplasm of  
479 alphaproteobacteria. This ancient protein-protein interaction suggests that, in addition to aiding the  
480 formation of ICM junctions, alphaproteobacterial Mic60 is also involved in the formation of contact  
481 sites that anchor ICMs to the alphaproteobacterial envelope. The formation of crista junctions and  
482 contact sites by Mic60 are aided by Mic19 in mitochondria<sup>40,42</sup>, but there is no evidence for a Mic19-  
483 like protein in alphaproteobacteria; our pull-downs did not reveal proteins with Coiled-Coil-Helix-  
484 Coiled-Coil-Helix (CHCH) motifs. In summary, it appears that both the formation of contact sites and  
485 Crista/ICM junctions have been conserved in alphaproteobacteria and mitochondria.

486 The larger macromolecular complex that Mic60 is part of in *R. sphaeroides* is reminiscent of the  
487 extended interaction network, ERMIONE, that in *S. cerevisiae* mitochondria involves Mic60<sup>68</sup>. In *S.*  
488 *cerevisiae*, the ER-mitochondria organizing network, or ERMIONE, plays a major role in  
489 mitochondrial biogenesis by connecting the ER-mitochondria encounter structure (ERMES) to  
490 MICOS through the outer membrane SAM and TOM complexes<sup>11,68</sup>. In *H. sapiens*, MICOS and SAM  
491 interact stably to form the Mitochondrial Intermembrane space Bridging complex (MIB) complex<sup>69</sup>. It  
492 is possible that BamA, through its interactions with Mic60, Orf52, OM Efflux, and RSP\_7515, serves  
493 as the hub of a larger protein-interaction network, that, for example, facilitates lipid transfer and  
494 protein export to the outer membrane. In the model alphaproteobacterium *Caulobacter crescentus*,  
495 the BAM complex has been shown to have a modular structure (including a ~300 kDa subcomplex)  
496 and interact with Pal, a lipoprotein that serves as an anchor to the peptidoglycan layer of the cell wall  
497<sup>70,71</sup>. In addition, contact sites may help to stabilize ICMs by providing an anchor to the OM at points of  
498 high membrane curvature, i.e., ICM junctions<sup>72</sup>. This may contribute to the biogenesis of ICMs by  
499 ensuring their continuity with the CM where protein complex subunits may first be inserted and  
500 assembled to give rise to UPBs.

501 The evidence for the structural and functional conservation of alphaproteobacterial Mic60 relative to  
502 its mitochondrial homolog is most compatible with an evolutionary scenario in which ICMs and cristae  
503 are homologous. This view implies that cristae most likely evolved from the ICMs developed by the  
504 last common ancestor of mitochondria and its sister group, the *Alphaproteobacteria*; cristae thus have

505 a pre-endosymbiotic origin. If this hypothesis turns out to be correct, bioenergetic ICMs might have  
506 pre-adapted the first mitochondrial ancestor to become an efficient bioenergetic or respiratory  
507 organelle<sup>26</sup>. The widespread but sporadic phylogenetic distribution of ICMs across the  
508 *Alphaproteobacteria* is then most likely explained by multiple independent losses. This is conceivable  
509 as both cristae and ICMs are known to have been lost repeatedly as a result of physiological  
510 specialization to different environments (e.g., transitions to anaerobiosis in mitochondria or to  
511 heterotrophy in photosynthetic bacteria). However, although many alphaproteobacteria may be  
512 capable of developing ICMs under certain environmental conditions (e.g., aerobic phototrophs or *C.*  
513 *crenscentus* under low oxygen conditions<sup>73</sup>), some probably never develop ICMs despite having Mic60  
514 homologs. In these alphaproteobacteria, Mic60 might play a more general function, e.g., contact site  
515 formation by interacting with BamA for lipid transfer or protein export, that is still required in the  
516 absence of ICMs. This more general function might have been ancestral to Mic60 and agrees with the  
517 observation that a distant homologue of Mic60 that lacks the conserved C-terminal mitofilin domain,  
518 namely HemX, is restricted to and widespread in the *Gammaproteobacteria*<sup>20</sup>. It is thus conceivable  
519 that the signature mitofilin domain first evolved in a HemX-like protein and that this coincided with the  
520 origin of ICMs in a common ancestor of alphaproteobacteria and mitochondria.

521 Future studies are required to elucidate the molecular mechanisms by which alphaproteobacterial  
522 Mic60 interacts with BamA, and determine whether alphaproteobacterial Mic60 forms homodimers  
523 and homotetramers as recently reported for fungal Mic60<sup>42</sup>. More generally, efforts focused on  
524 phylogenetically disparate alphaproteobacteria with and without ICMs will shed light on the functions  
525 and mechanisms of Mic60 in prokaryotes. Altogether, the structural and functional conservation of  
526 alphaproteobacterial Mic60 shown here, suggests a role of this protein in curving membranes at ICM  
527 junctions and making contact sites at envelopes. It is therefore probable that the mitochondrial  
528 ancestor was an ICM-bearing alphaproteobacterium.

## 529 MATERIALS AND METHODS

### 530 Bacterial strains, media and growth conditions

531 *R. palustris* TIE-1 and *E. coli* BW29427- $\lambda$ pir-RP4 were kindly provided by Dianne K. Newman  
532 (California Institute of Technology)<sup>74</sup>. *R. sphaeroides* 2.4.1, *E. coli* S17-1- $\lambda$ pir, and *E. coli* DH5 $\alpha$ - $\lambda$ pir  
533 were kindly provided by Jeanette Johnson-Beatty (University of British Columbia). *R. palustris* TIE-1  
534 strain was grown both chemo- and photo-heterotrophically at 30 °C in YPS rich medium (Jiao et al.,  
535 2005) unless otherwise noted. *R. palustris* TIE-1 was grown photoheterotrophically at 30 °C on FEM  
536 minimal medium<sup>75</sup>. *R. sphaeroides* 2.4.1 strain was grown chemoheterotrophically at 30 °C in LB or  
537 RLB rich media<sup>76</sup>, unless otherwise noted, and photoheterotrophically at 30 °C on RCVBN minimal  
538 medium<sup>77</sup>. Table S1 lists all strains used this study.

539 For growth analysis under photoheterotrophic conditions, *R. sphaeroides* and *R. palustris* mutants  
540 and WT strains were grown in front to three incandescent 40 W lightbulbs at a temperature of 29 °C,  
541 with the distances of the culture tubes from the light sources adjusted to allow the appropriate light  
542 intensities and temperature. The light intensities were measured to be ~200  $\mu\text{mol photons m}^{-2} \text{s}^{-1}$  for  
543 high light and ~10  $\mu\text{mol photons m}^{-2} \text{s}^{-1}$  for low light. The latter was achieved by placing the two layers  
544 of approximately ~ 50 % neutral density filter sheeting between the light source and culture tubes.  
545 Prior to growth analysis, cells were grown in rich media in triplicate (*R. sphaeroides*, RLB without  
546 antibiotics; *R. palustris*, YPS no antibiotic for WT, 400  $\mu\text{g/ml}$  kanamycin for mutants) until mid-log  
547 phase. At mid-log phase equivalent amounts of cells (turbidity x volume = 20, i.e., if the turbidity value  
548 was equal to 5.10, then 3.92 ml of cells were decanted) were removed from the growth tubes into 15  
549 ml Falcon tubes and pelleted by centrifugation. The pellet was washed once in minimal media and  
550 resuspended in 1 ml of the required minimal media (*R. sphaeroides* 10 ml RCVBN + 8 ml RLB and *R.*  
551 *palustris* FEM). A 150  $\mu\text{l}$  volume of each cell line suspension was inoculated in triplicate; this was  
552 time point 0. Turbidity measurements were performed using a McFarland Densitometer DEN-1B that  
553 measures at  $\lambda = 565 \pm 15 \text{ nm}$ . Turbidity measurements were then taken every 6 h for a total  
554 experiment length of 72 h. For analysis of chemoheterotrophic growth, the same approach was made  
555 except the cell cultures were grown in the dark in well-aerated flasks that were under constant  
556 agitation to ensure gas exchange. Whole-cell absorption spectra of these cells were measured to



557 verify the absence of LH1 and LH2 complexes under these conditions (Fig S3D). Spectra were  
558 recorded from bacterial strains grown to late-log phase at all photoheterotrophic and  
559 chemoheterotrophic conditions after resuspension in MES buffer pH 6.8 resuspended to OD ~6.5.  
560 The absorption spectra were measured at 0.5 nm intervals using a Shimadzu UV-Vis-NIR UV2600  
561 spectrophotometer equipped with an integrating sphere. The resulting spectra were normalised to OD  
562 = 1 at the BChl Qx (~ 590 nm) peak for comparison.

#### 563 DNA methods and plasmid construction

564 Total genomic DNA (gDNA) was extracted from *R. sphaeroides* and *R. palustris* strains using the ZR  
565 Bacterial DNA Miniprep Kit (Zymo Research) with a BIO101/Savant FastPrep FP120 high-speed bead  
566 beater and a 30 min incubation at 60°C with 20 µl of proteinase K (20 mg/mL), or the Epicentre  
567 MasterPure DNA Purification Kit (Epicentre Biotechnologies). All plasmid constructs were built with  
568 the Gibson Assembly Master Mix or the NEB Builder HiFi DNA Assembly (both New England  
569 Biolabs). Plasmids were isolated using the AxyPrep Plasmid Miniprep Kit (Axygen). All plasmid  
570 constructs were confirmed by Sanger sequencing using both forward and reverse primers. Table S2  
571 lists all plasmids used. Table S3 lists all primers used in this study.

#### 572 Construction of *R. sphaeroides* and *R. palustris* knockout strains

573 To knock out genes in *R. sphaeroides*, a knockout construct was assembled into the suicide plasmid  
574 vector pZDJ<sup>78</sup> with either the Gibson Assembly Cloning Kit or the NEBuilder HiFi DNA Assembly  
575 Master Mix (both New England Biolabs). The antibiotic resistance cassette flanked by flippase  
576 recognition target (FRT) sites used to interrupt the genes to be knocked out corresponds to that used  
577 in the Keio collection<sup>79</sup>. The resulting suicide vector with the knockout construct was cloned into *E.*  
578 *coli* S17-1 λ-pir-RP4, which can replicate the suicide plasmid. This strain was then conjugated with *R.*  
579 *sphaeroides* 2.4.1. Briefly, donor and recipient cells grown to stationary phase were mixed in a 1:2  
580 volume ratio and pelleted by centrifugation for 1 min at 4,500-6,000 × g, and then washed twice with  
581 antibiotic-free RCVBN minimal medium. After the last wash, the pellet was resuspended in 50 µl of  
582 RCVBN, and 10 µl aliquots were spotted onto antibiotic-free RCVBN solid medium. The plates were  
583 incubated at 30° C overnight to allow conjugation to take place. Afterwards, an emulsion was made  
584 from the several inoculation spots and streaked onto antibiotic-containing RCVBN+Gm solid medium.  
585 *R. sphaeroides* exconjugants were then successively streaked onto new LB+Gm solid medium until  
586 no *E. coli* S17-1 λ-pir-RP4 contamination remained. The resulting pure *R. sphaeroides* exconjugants  
587 contained the pZDJ plasmid, with the knockout gene construct, integrated in the chromosome by a  
588 first crossing over (recombination) event. To induce a second crossing over to excise the pZDJ  
589 suicide plasmid from the host chromosome, colonies were picked and grown on liquid LB with no  
590 antibiotic selection until late stationary phase (about 2-3 days). The cultures were then streaked on  
591 LB+10% sucrose solid medium, which allows for counter-selecting of those colonies that have lost the  
592 integrated pZDJ plasmid. The counter-selection relies on the *sacB* gene carried by the suicide  
593 plasmid<sup>50</sup>. In order to induce a third crossing over between the FRT sites of the kanamycin cassette,  
594 cells were grown in liquid LB without any antibiotic selection until late stationary phase and then  
595 streaked on LB solid medium. Resultant colonies were then screened through PCR assays.

596 To make knockout strains for *R. palustris*, the same general protocol used for *R. sphaeroides* was  
597 followed<sup>80</sup>. The suicide plasmid used for *R. palustris* was pJQ200SK<sup>81</sup> and the host strain was *E. coli*  
598 BW29427-λpir-RP4, which requires 300 µM diaminopimelic acid for growth. This auxotrophy allows to  
599 easily remove the plasmid-donor bacterium from the medium after conjugation.

#### 600 Construction of *R. sphaeroides* and *R. palustris* overexpression strains

601 To create Mic60- and Orf52-overexpressing strains, the inducible expression plasmids for *R.*  
602 *sphaeroides* pIND4 -Km and pIND4-Gm were kindly provided by Judith P. Armitage (University of  
603 Oxford), and Alexander Westbye (University of British Columbia), respectively. The inducible  
604 expression plasmid pSRK was used in *R. palustris*. The coding sequences of the *mic60* and *orf52*  
605 genes of *R. sphaeroides* and *R. palustris* were amplified by PCR and assembled into the expression  
606 vectors pIND4 and pSRK, respectively, with the NEBuilder HiFi DNA Assembly Master Mix (New  
607 England Biolabs). The *mic60* and *orf52* homologs were cloned into kanamycin resistance-conferring

608 plasmids and gentamycin resistance-conferring plasmids, respectively. To insert the C-terminal 6xHis  
609 tag as part of the coding sequences of *mic60* and *orf52* the BamHI and BglII restriction sites in pIND4  
610 were used, or the tag was incorporated as part of the primer used to amplify the targets in *R.*  
611 *palustris*. The assembled plasmids were transformed into suitable conjugative *E. coli* hosts, and  
612 conjugation assays with recipient *R. sphaeroides* and *R. palustris* strains were done as described  
613 above. After conjugation, the exconjugants were repeatedly streaked onto antibiotic-containing plates  
614 to remove the plasmid-donor bacterium. The resulting overexpression strains were further verified by  
615 RT qPCR.

#### 616 RT qPCR

617 *R. sphaeroides* and *R. palustris* strains were grown in triplicate until mid-log phase as described for  
618 growth analysis, after which 1 mM IPTG was added, and the cells allowed to grow for 7 h 20 min for  
619 *R. sphaeroides* and 4 h 30 min for *R. palustris*; cultures were grown in parallel in the absence of  
620 IPTG. Then 1 ml of cell suspension was centrifuged and the pellet resuspended in 1 ml of PGTX  
621 nucleic acid extraction buffer<sup>82</sup>. The samples were then flash frozen and stored at -20 °C until the  
622 PGTX-mediated nucleic acid extraction procedure, essentially following the classical  
623 phenol/chloroform extraction method (Pinto et al., 2009). Briefly, isolated total nucleic acid  
624 concentration was measured using a NanoDrop DeNovix DS-11 (Thermo Fisher) and diluted to 100  
625 ng/μL in 50 μl DNase/RNase-free H<sub>2</sub>O. The digestion of gDNA was performed by addition of DNase I  
626 (Qiagen) and the concentration of total RNA was measured using the Qubit 2.0 Fluorometer (Thermo  
627 Fisher). A total of 100 ng RNA was subsequently reverse transcribed using the Transcriptor First  
628 Strand cDNASynthesis Kit (Roche) at 55 °C for cDNA synthesis. Quantitative PCR (qPCR) was  
629 performed in triplicates in a CFX96 qPCR cyclor (Bio-Rad) in 20 μl reactions containing 1x PowerUp  
630 Sybr Green master mix (Applied Biosystems, USA), 8 pmol of each primer, and 10 μg cDNA with the  
631 following program: initial denaturation 10 min at 95 °C; 45 cycles of 15 s at 95 °C and 30 s at 60 °C.  
632 Primers annealing to *mic60*, *orf52*, and the *rpoZ* cDNAs used for qPCR are listed in Table S3. Cycle  
633 threshold values were automatically computed with the CFX Maestro software (Bio-Rad). Additionally,  
634 non-reverse transcribed RNA sample was used as a control to verify complete degradation of  
635 genomic DNA. Relative abundance of transcripts in cells grown in the presence of IPTG compared to  
636 those grown without the inducing agent was calculated using the  $2^{-\Delta\Delta CT}$  method<sup>83</sup>; the unaffected  
637 *rpoZ* housekeeping gene cDNA was used to normalize the *mic60* and *orf52* values.

#### 638 Transmission electron microscopy

639 Both classical TEM and electron tomography on 80 nm-thick sections were done as previously  
640 described (Cadena et al., 2021; Kaurov et al., 2018). Scoring of *R. palustris* ICM area/TEM area and  
641 *R. sphaeroides* tubules/cell per section were performed blinded on images obtained using JEOL 1010  
642 TEM operating at an accelerating voltage of 80 kV and equipped with a MegaView III CCD camera  
643 (SIS). Measurement of *R. palustris* ICM and total cell areas was done using Image J software<sup>84</sup> by  
644 tracing along the outermost electron dense membranes of the ICM network and the outer membrane,  
645 respectively. The occurrence of tubule-like and branching ICMs in *R. sphaeroides* was counted on  
646 20-21 images that were taken at 40,000x magnification (2.56 nm/pixel) at random parts of the grid as  
647 before (Kaurov et al., 2018). These images were mixed and randomized prior to blind scoring.

648 Electron tomograms were collected at a range of  $\pm 65^\circ$  with tilt  $1^\circ$  steps using the JEOL 2100F TEM  
649 working at 200 kV, equipped with Gatan camera K2 Summit and controlled with SerialEM automated  
650 acquisition software<sup>85</sup>. IMOD software<sup>86</sup> was used for tomogram reconstruction and generating 3D  
651 models by segmentation.

#### 652 SDS PAGE and Western blotting

653 Bacterial lysates were separated on a Bolt 4-12% Bis-Tris Plus gel (Invitrogen), blotted onto a PVDF  
654 membrane (Amersham), blocked in 5% low-fat, powdered milk (w/v) in phosphate buffered saline with  
655 0.1% Tween 20 (v/v) (PBS-T), and probed with 6x-His Tag Monoclonal Antibody (HIS.H8) (Thermo  
656 Fisher Scientific #MA1-21315) diluted in 5% milk in PBS-T (1:500). This was followed by incubation  
657 with secondary HRP-conjugated anti-mouse antibody (1:2000; Bio-Rad). Proteins were visualized  
658 using the Pierce ECL system (Genetica/Bio-Rad) on a ChemiDoc imager (Bio-Rad).

## 659 Isolation of ICMs via high-pressure homogenization and light spectroscopy

660 *R. sphaeroides* strains were cultured identically in C-succinate media<sup>87</sup> in flat, glass bottles at 28-  
661 30°C under anaerobic conditions. Illumination was provided by one incandescent 40W bulb providing  
662 ~10  $\mu\text{mol photons m}^{-2} \text{s}^{-1}$ . The cells were fully adapted to the incident light-intensity and harvested by  
663 centrifugation once they had reached mid-log phase. Cell pellets were washed in 20 mM MES, 100  
664 mM KCl, pH 6.8, then flash frozen and stored at -80 °C until required

665 The cell pellets were re-suspended in 20 mM Tris.Cl, pH 8.0 and homogenised thoroughly with a few  
666 grains of DNase I (Qiagen) and a few mg of MgCl<sub>2</sub>. The cells were broken by passage three times  
667 through an Emulsiflex-C5 cell disrupter (Avestin). The ruptured cell solution was first subjected to a  
668 low-speed centrifugation step (10 min, 10,000  $\times g$ , 4°C) to remove any unbroken cells. The decanted  
669 supernatant was ultra-centrifuged (120 min, 180,000  $\times g$ , 4°C), after which the supernatant was  
670 discarded. The resulting chromatophore pellet was gently re-suspended in 20 mM Tris-HCl pH 8.0  
671 before the optical density was adjusted to 10  $\text{cm}^{-1}$  at the Qx absorption maximum (~590 nm) using a  
672 Shimadzu UV-Vis-NIR UV2600 spectrophotometer equipped with an integrating sphere.

## 673 Blue Native PAGE

674 BN-PAGE of isolated ICMs was adapted from published protocols (Cadena et al., 2021). Briefly, 1 mg  
675 of total protein was resuspended in 100  $\mu\text{l}$  NativePAGE sample buffer (Invitrogen), lysed with 1.5%  
676 digitonin (v/v) and 0.1% Triton X-100 (v/v) for 1 h on ice then cleared by centrifugation (22,000  $\times g$ , 20  
677 min, 4 °C). Subsequently, 5% Coomassie brilliant blue G-250 was added before loading ~100  $\mu\text{g}$  on a  
678 3-12% Bis-Tris BNE gel (Invitrogen). After electrophoresis (2.5 hours, 150 V, 4 °C), the gel was  
679 blotted onto a PVDF membrane (Amersham) and probed as described above.

## 680 Affinity purification

681 Affinity purification (AP) of tagged proteins from 1 mg isolated ICMs were solubilized in IPP50 buffer  
682 (50 mM KCl, 20 mM Tris-HCl pH 7.7, 3 mM MgCl<sub>2</sub>, 10% glycerol, 1 mM phenylmethanesulfonyl  
683 fluoride, complete EDTA free protease inhibitor cocktail (Roche) supplemented with 1.5% digitonin  
684 (v/v) and 0.1% Triton X-100 (v/v) for 1 h on ice. After centrifugation (22,000  $\times g$ , 20 min, 4 °C) the  
685 supernatant was added to 2.0 mg of cobalt conjugated Dynabeads (Thermo Fisher) to capture the  
686 His-tag. The Dynabeads were pre-washed in 300  $\mu\text{l}$  of IPP50 + 1.5% digitonin for 5 min at RT. The  
687 solubilized ICMs were rotated with beads for 90 min at 4 °C. After removal of the flow-through, the  
688 beads were washed three times in IPP50 + 1.5% digitonin. Prior to eluting, the beads were transferred  
689 into a new tube. Elution was done with 300 mM imidazole in IPP50 for 15 min at RT and shaking at  
690 1000 rpm. The elutes were further processed for LC-MS<sup>2</sup> analysis or resolved by SDS-PAGE. APs  
691 were performed in triplicate.

## 692 Protein preparation and mass spectroscopy

693 Individual bands containing proteins of interest were excised from Coomassie stained SDS PAGE gel  
694 using a razor blade and cut into small pieces (~1  $\text{mm}^3$ ). Bands were destained by sonication for 30  
695 min in 50% acetonitrile (ACN) and 50 mM ammonium bicarbonate (ABC). After destaining, gels were  
696 dried in ACN. Disulfide bonds were reduced using 10mM DTT in 100mM ABC at 60°C for 30 min.  
697 After that, samples were again dried with ACN and free cysteine residues were blocked using 55 mM  
698 iodoacetamide in 100 mM ABC for 10 min at room temperature in the dark. Samples were dried  
699 thoroughly and then digestion buffer (10% ACN, 40 mM ABC and 13 ng/ $\mu\text{l}$  trypsin) was added to  
700 cover gel pieces. Proteins were digested at 37 °C overnight. After digestion, 150  $\mu\text{l}$  of 50% ACN with  
701 0,5% formic acid was added and sonicated for 30 min. Supernatant containing peptides was  
702 transferred to a new microcentrifuge tube and another 150  $\mu\text{l}$  of elution solution was added and  
703 sonicated for 30 min. This solution was removed, combined with the previous solution and dried by  
704 SpeedVac. Dried peptides were reconstituted in 2% ACN with 0,1% TFA and injected into Ultimate  
705 3000 Nano LC coupled to Orbitrap Fusion.

706 Eluates of co-AP proteins and thin-sliced BN-PAGE gels were processed for MS analysis as  
707 described elsewhere (Cadena et al., 2021). In brief, eluate samples were resuspended in 100 mM  
708 tetraethylammonium bromide containing 2% sodium deoxycholate. Cysteines were reduced with 10

709 mM tris(2-carboxyethyl)phosphine and subsequently cleaved with 1 µg trypsin overnight at 37 °C.  
710 After digestion, 1% trifluoroacetic acid (TFA) was added to wash twice and eluates were resuspended  
711 in 20 µl TFA per µg of protein. A nano reversed-phased column (EASY-Spray column, 50 cm x 75 µm  
712 inner diameter, PepMap C18, 2 µm particles, 100 Å pore size) was used for LC/MS analysis. Mobile  
713 phase buffer A consisted of water and 0.1% formic acid. Mobile phase D consisted of acetonitrile and  
714 0.1% formic acid. Samples were loaded onto the trap column (Acclaim PepMap300, C18, 5 µm, 300 Å  
715 pore size, 300 µm x 5 mm) at a flow rate of 15 µl/min. The loading buffer consisted of water, 2%  
716 acetonitrile, and 0.1% TFA. Peptides were eluted using a Mobile phase B gradient from 2% to 40%  
717 over 60 min at a flow rate of 300 ml/min. The peptide cations eluted were converted to gas-phase ions  
718 via electrospray ionization and analyzed on a Thermo Orbitrap Fusion (Q-OT- qIT, Thermo Fisher).  
719 Full MS spectra were acquired in the Orbitrap with a mass range of 350-1, 400 *m/z*, at a resolution of  
720 120,000 at 200 *m/z* and with a maximum injection time of 50 ms. Tandem MS was performed by  
721 isolation at 1.5 Th with the quadrupole, high-energy collisional dissociation (HCS) fragmentation with  
722 normalized collision energy of 30, and rapid scan MS analysis in the ion trap. The MS/MS ion count  
723 target was set to 10<sup>4</sup> and the max infection time at 35 ms. Only those precursors with a charge state  
724 of 2-6 were sampled. The dynamic exclusion duration was set to 45 s with a 10 ppm tolerance around  
725 the selected precursor and its isotopes. Monoisotopic precursor selection was on with a top speed  
726 mode of 2 s cycles.

#### 727 Analysis of mass spectroscopy peptides

728 Label-free quantification of the data were analyzed using the MaxQuant software (version 1.6.2.1)<sup>88</sup>.  
729 The false discovery rates for peptides and for proteins was set to 1% with a specified minimum  
730 peptide length of seven amino acids. The Andromeda search engine was used for the MS/MS spectra  
731 against the *R. sphaeroides* 2.4.1 predicted proteome (ASM1290v2) downloaded from NCBI GenBank  
732 on October 2020. Enzyme specificity was set to C-terminal Arg and Lys, alongside for cleavage at  
733 proline bonds with a maximum of two missed cleavages. Dithiomethylation of cysteine was selected  
734 as a fixed modification with N-terminal protein acetylation and methionine oxidation as variable  
735 modifications. The 'match between runs' feature in MaxQuant was used to transfer identification to  
736 other LC-MS/MS runs based on mass and retention time with a maximum deviation of 0.7 min.  
737 Quantifications were performed using a label-free algorithm as previously described (Cox et al.,  
738 2014). Data analysis was performed using Perseus software (version 1.6.1.3). Eluate co-AP proteins  
739 identified with a mean Log<sub>2</sub> ratio (protein<sub>His</sub>/WT) >3-fold change and having a Andromeda confidence  
740 score >100 (Cox et al., 2011) in three independent biological replicates were analyzed, while gel-slice  
741 proteins identified with a mean Log<sub>2</sub> transformed LFQ score >23 and present in four biological  
742 replicates were analyzed.

#### 743 Quantification and statistical analysis

744 Statistical significance as determined by unpaired t-test using the GraphPad Prism 7 are reported in  
745 the figures and legends.

#### 746 Data Availability

747 The LC-MS/MS data have been deposited to the ProteomeXchange Consortium  
748 (<http://www.proteomexchange.org>) via the PRIDE partner repository with the data set identifier  
749 PXD032747.

#### 750 **ACKNOWLEDGEMENTS**

751 We would like to dedicate this work to Thomas Cavalier-Smith whose large-scale synthetic work on  
752 evolutionary cell biology stimulated thinking on this topic by SAM-G many years ago. We thank Karel  
753 Harant and Pavel Talacko (Charles University, Prague) for performing LC-MS analysis and Michala  
754 Boudová (Center Algatech) for technical assistance. SAM-G is supported by an EMBO Postdoctoral  
755 Fellowship (ALTF 21-2020). MML was supported by a Nova Scotia Health Research Foundation  
756 (NSHRF) Scotia Scholarship 2012-8781. This work was also supported by the Czech Science  
757 Foundation grants 20-23513S to HH, 22-01-26S to JL and 19-28778X to MK, ERD Fund  
758 (003/0000441) to TB, as well as the Czech Ministry of Education grant OPVVV16\_019/0000759 and  
759 Czech Biolmaging grant LM2015062. AJR and JTB were supported by Natural Sciences and



760 Engineering Research Council of Canada (grants RGPIN-2022-05430 and RGPIN-2018-08398,  
761 respectively).

## 762 REFERENCES

- 763 1. Roger, A.J., Muñoz-Gómez, S.A., and Kamikawa, R. (2017). The Origin and Diversification of  
764 Mitochondria. *Curr Biol* 27, R1177–R1192. [10.1016/j.cub.2017.09.015](https://doi.org/10.1016/j.cub.2017.09.015).
- 765 2. Muñoz-Gómez, S.A., Susko, E., Williamson, K., Eme, L., Slamovits, C.H., Moreira, D., López-  
766 García, P., and Roger, A.J. (2022). Site-and-branch-heterogeneous analyses of an expanded  
767 dataset favour mitochondria as sister to known Alphaproteobacteria. *Nat Ecol Evol* 6, 253–262.  
768 [10.1038/s41559-021-01638-2](https://doi.org/10.1038/s41559-021-01638-2).
- 769 3. Martijn, J., Vosseberg, J., Guy, L., Offre, P., and Ettema, T.J.G. (2018). Deep mitochondrial origin  
770 outside the sampled alphaproteobacteria. *Nature* 557, 101–105. [10.1038/s41586-018-0059-5](https://doi.org/10.1038/s41586-018-0059-5).
- 771 4. Fan, L., Wu, D., Goremykin, V., Xiao, J., Xu, Y., Garg, S., Zhang, C., Martin, W.F., and Zhu, R.  
772 (2020). Phylogenetic analyses with systematic taxon sampling show that mitochondria branch  
773 within Alphaproteobacteria. *Nat Ecol Evol* 4, 1213–1219. [10.1038/s41559-020-1239-x](https://doi.org/10.1038/s41559-020-1239-x).
- 774 5. Hammond, M., Dorrell, R.G., Speijer, D., and Lukeš, J. (2022). Eukaryotic cellular intricacies  
775 shape mitochondrial proteomic complexity. *BioEssays* 44, 2100258. [10.1002/bies.202100258](https://doi.org/10.1002/bies.202100258).
- 776 6. Schavemaker, P.E., and Muñoz-Gómez, S.A. (2022). The role of mitochondrial energetics in the  
777 origin and diversification of eukaryotes. *bioRxiv*, 2021.10.23.465364.  
778 [10.1101/2021.10.23.465364](https://doi.org/10.1101/2021.10.23.465364).
- 779 7. Daems, W.T., and Wisse, E. (1966). Shape and attachment of the cristae mitochondriales in  
780 mouse hepatic cell mitochondria. *J Ultrastruct Res* 16, 123–140. [10.1016/s0022-5320\(66\)80027-8](https://doi.org/10.1016/s0022-5320(66)80027-8).
- 781 8. Mannella, C.A., Marko, M., Penczek, P., Barnard, D., and Frank, J. (1994). The internal  
782 compartmentation of rat-liver mitochondria: tomographic study using the high-voltage  
783 transmission electron microscope. *Microsc Res Tech* 27, 278–283. [10.1002/jemt.1070270403](https://doi.org/10.1002/jemt.1070270403).
- 784 9. Perkins, G., Renken, C., Martone, M.E., Young, S.J., Ellisman, M., and Frey, T. (1997). Electron  
785 tomography of neuronal mitochondria: three-dimensional structure and organization of cristae and  
786 membrane contacts. *J Struct Biol* 119, 260–272. [10.1006/jsbi.1997.3885](https://doi.org/10.1006/jsbi.1997.3885).
- 787 10. Zick, M., Rabl, R., and Reichert, A.S. (2009). Cristae formation-linking ultrastructure and function  
788 of mitochondria. *Biochim Biophys Acta* 1793, 5–19. [10.1016/j.bbamcr.2008.06.013](https://doi.org/10.1016/j.bbamcr.2008.06.013).
- 789 11. Wideman, J.G., and Muñoz-Gómez, S.A. (2016). The evolution of ERMIONE in mitochondrial  
790 biogenesis and lipid homeostasis: An evolutionary view from comparative cell biology. *Biochim*  
791 *Biophys Acta* 1861, 900–912. [10.1016/j.bbalip.2016.01.015](https://doi.org/10.1016/j.bbalip.2016.01.015).
- 792 12. Kühlbrandt, W. (2019). Structure and Mechanisms of F-Type ATP Synthases. *Annu Rev Biochem*  
793 88, 515–549. [10.1146/annurev-biochem-013118-110903](https://doi.org/10.1146/annurev-biochem-013118-110903).
- 794 13. Pánek, T., Eliáš, M., Vancová, M., Lukeš, J., and Hashimi, H. (2020). Returning to the Fold for  
795 Lessons in Mitochondrial Crista Diversity and Evolution. *Curr Biol* 30, R575–R588.  
796 [10.1016/j.cub.2020.02.053](https://doi.org/10.1016/j.cub.2020.02.053).
- 797 14. Rampelt, H., Zerbes, R.M., van der Laan, M., and Pfanner, N. (2017). Role of the mitochondrial  
798 contact site and cristae organizing system in membrane architecture and dynamics. *Biochim*  
799 *Biophys Acta Mol Cell Res* 1864, 737–746. [10.1016/j.bbamcr.2016.05.020](https://doi.org/10.1016/j.bbamcr.2016.05.020).
- 800 15. Kozjak-Pavlovic, V. (2017). The MICOS complex of human mitochondria. *Cell Tissue Res* 367,  
801 83–93. [10.1007/s00441-016-2433-7](https://doi.org/10.1007/s00441-016-2433-7).
- 802

- 803 16. Wollweber, F., von der Malsburg, K., and van der Laan, M. (2017). Mitochondrial contact site and  
804 cristae organizing system: A central player in membrane shaping and crosstalk. *Biochimica et*  
805 *Biophysica Acta (BBA) - Molecular Cell Research* 1864, 1481–1489.  
806 10.1016/j.bbamcr.2017.05.004.
- 807 17. Michaud, M., Gros, V., Tardif, M., Brugière, S., Ferro, M., Prinz, W.A., Toulmay, A., Mathur, J.,  
808 Wozny, M., Falconet, D., et al. (2016). AtMic60 Is Involved in Plant Mitochondria Lipid Trafficking  
809 and Is Part of a Large Complex. *Curr Biol* 26, 627–639. 10.1016/j.cub.2016.01.011.
- 810 18. Kaurov, I., Vancová, M., Schimanski, B., Cadena, L.R., Heller, J., Bílý, T., Potěšil, D.,  
811 Eichenberger, C., Bruce, H., Oeljeklaus, S., et al. (2018). The Diverged Trypanosome MICOS  
812 Complex as a Hub for Mitochondrial Cristae Shaping and Protein Import. *Curr Biol* 28, 3393-  
813 3407.e5. 10.1016/j.cub.2018.09.008.
- 814 19. Muñoz-Gómez, S.A., Slamovits, C.H., Dacks, J.B., Baier, K.A., Spencer, K.D., and Wideman,  
815 J.G. (2015). Ancient homology of the mitochondrial contact site and cristae organizing system  
816 points to an endosymbiotic origin of mitochondrial cristae. *Curr Biol* 25, 1489–1495.  
817 10.1016/j.cub.2015.04.006.
- 818 20. Huynen, M.A., Mühlmeister, M., Gotthardt, K., Guerrero-Castillo, S., and Brandt, U. (2016).  
819 Evolution and structural organization of the mitochondrial contact site (MICOS) complex and the  
820 mitochondrial intermembrane space bridging (MIB) complex. *Biochim Biophys Acta* 1863, 91–  
821 101. 10.1016/j.bbamcr.2015.10.009.
- 822 21. Drews, G. (1991). Intracytoplasmic membranes in bacterial cells: organization, function, and  
823 biosynthesis. In *Prokaryotic Structure and Function: A New Perspective Forty-seventh*  
824 *Symposium of the Society for General Microbiology Held at the University of Edinburgh.*  
825 (Cambridge University Press).
- 826 22. Niederman, R.A. (2006). Structure, Function and Formation of Bacterial Intracytoplasmic  
827 Membranes. In *Complex Intracellular Structures in Prokaryotes Microbiology Monographs.*, J. M.  
828 Shively, ed. (Springer Berlin Heidelberg), pp. 193–227. 10.1007/7171\_025.
- 829 23. Pinevich, A.V. (1997). Intracytoplasmic membrane structures in bacteria. *Endocytobiosis and Cell*  
830 *Research* 12, 9–40.
- 831 24. LaSarre, B., Kysela, D.T., Stein, B.D., Ducret, A., Brun, Y.V., and McKinlay, J.B. (2018).  
832 Restricted Localization of Photosynthetic Intracytoplasmic Membranes (ICMs) in Multiple Genera  
833 of Purple Nonsulfur Bacteria. *mBio* 9, e00780-18. 10.1128/mBio.00780-18.
- 834 25. Sener, M., Strumpfer, J., Singharoy, A., Hunter, C.N., and Schulten, K. (2016). Overall energy  
835 conversion efficiency of a photosynthetic vesicle. *eLife* 5, e09541. 10.7554/eLife.09541.
- 836 26. Muñoz-Gómez, S.A., Wideman, J.G., Roger, A.J., and Slamovits, C.H. (2017). The Origin of  
837 Mitochondrial Cristae from Alphaproteobacteria. *Mol Biol Evol* 34, 943–956.  
838 10.1093/molbev/msw298.
- 839 27. Tarasenko, D., Barbot, M., Jans, D.C., Kroppen, B., Sadowski, B., Heim, G., Möbius, W., Jakobs,  
840 S., and Meinecke, M. (2017). The MICOS component Mic60 displays a conserved membrane-  
841 bending activity that is necessary for normal cristae morphology. *Journal of Cell Biology* 216,  
842 889–899. 10.1083/jcb.201609046.
- 843 28. Dietz, J.V., Willoughby, M.M., Piel, R.B., Ross, T.A., Bohovych, I., Addis, H.G., Fox, J.L.,  
844 Lanzilotta, W.N., Dailey, H.A., Wohlschlegel, J.A., et al. (2021). Mitochondrial contact site and  
845 cristae organizing system (MICOS) machinery supports heme biosynthesis by enabling optimal  
846 performance of ferrochelatase. *Redox Biol* 46, 102125. 10.1016/j.redox.2021.102125.
- 847 29. Kobayashi, K., Masuda, T., Tajima, N., Wada, H., and Sato, N. (2014). Molecular Phylogeny and  
848 Intricate Evolutionary History of the Three Isofunctional Enzymes Involved in the Oxidation of  
849 Protoporphyrinogen IX. *Genome Biology and Evolution* 6, 2141–2155. 10.1093/gbe/evu170.

- 850 30. Myers, K.S., Vera, J.M., Lemmer, K.C., Linz, A.M., Landick, R., Noguera, D.R., and Donohue,  
851 T.J. (2020). Genome-Wide Identification of Transcription Start Sites in Two Alphaproteobacteria,  
852 *Rhodobacter sphaeroides* 2.4.1 and *Novosphingobium aromaticivorans* DSM 12444. *Microbiol*  
853 *Resour Announc* 9, e00880-20. 10.1128/MRA.00880-20.
- 854 31. Dziuba, M., Riese, C.N., Borgert, L., Wittchen, M., Busche, T., Kalinowski, J., Uebe, R., and  
855 Schüler, D. (2021). The Complex Transcriptional Landscape of Magnetosome Gene Clusters in  
856 *Magnetospirillum gryphiswaldense*. *mSystems* 6, e00893-21. 10.1128/mSystems.00893-21.
- 857 32. Imhoff, J.F., Rahn, T., Künzel, S., and Neulinger, S.C. (2018). Photosynthesis Is Widely  
858 Distributed among Proteobacteria as Demonstrated by the Phylogeny of PufLM Reaction Center  
859 Proteins. *Front. Microbiol.* 8, 2679. 10.3389/fmicb.2017.02679.
- 860 33. Iba, K., Takamiya, K., Toh, Y., and Nishimura, M. (1988). Roles of bacteriochlorophyll and  
861 carotenoid synthesis in formation of intracytoplasmic membrane systems and pigment-protein  
862 complexes in an aerobic photosynthetic bacterium, *Erythrobacter* sp. strain OCh114. *J Bacteriol*  
863 170, 1843–1847. 10.1128/jb.170.4.1843-1847.1988.
- 864 34. Lee, M.D. (2019). GToTree: a user-friendly workflow for phylogenomics. *Bioinformatics* 35, 4162–  
865 4164. 10.1093/bioinformatics/btz188.
- 866 35. Nguyen, L.-T., Schmidt, H.A., von Haeseler, A., and Minh, B.Q. (2015). IQ-TREE: a fast and  
867 effective stochastic algorithm for estimating maximum-likelihood phylogenies. *Mol Biol Evol* 32,  
868 268–274. 10.1093/molbev/msu300.
- 869 36. Parks, D.H., Chuvochina, M., Rinke, C., Mussig, A.J., Chaumeil, P.-A., and Hugenholtz, P.  
870 (2022). GTDB: an ongoing census of bacterial and archaeal diversity through a phylogenetically  
871 consistent, rank normalized and complete genome-based taxonomy. *Nucleic Acids Research* 50,  
872 D785–D794. 10.1093/nar/gkab776.
- 873 37. Mai, U., and Mirarab, S. (2018). TreeShrink: fast and accurate detection of outlier long branches  
874 in collections of phylogenetic trees. *BMC Genomics* 19, 272. 10.1186/s12864-018-4620-2.
- 875 38. Menardo, F., Loiseau, C., Brites, D., Coscolla, M., Gygli, S.M., Rutaihw, L.K., Trauner, A.,  
876 Beisel, C., Borrell, S., and Gagneux, S. (2018). Treemmer: a tool to reduce large phylogenetic  
877 datasets with minimal loss of diversity. *BMC Bioinformatics* 19, 164. 10.1186/s12859-018-2164-8.
- 878 39. Mistry, J., Chuguransky, S., Williams, L., Qureshi, M., Salazar, G.A., Sonnhammer, E.L.L.,  
879 Tosatto, S.C.E., Paladin, L., Raj, S., Richardson, L.J., et al. (2021). Pfam: The protein families  
880 database in 2021. *Nucleic Acids Research* 49, D412–D419. 10.1093/nar/gkaa913.
- 881 40. Hessenberger, M., Zerbes, R.M., Rampelt, H., Kunz, S., Xavier, A.H., Purfürst, B., Lilie, H.,  
882 Pfanner, N., van der Laan, M., and Daumke, O. (2017). Regulated membrane remodeling by  
883 Mic60 controls formation of mitochondrial crista junctions. *Nat Commun* 8, 15258.  
884 10.1038/ncomms15258.
- 885 41. Drozdetskiy, A., Cole, C., Procter, J., and Barton, G.J. (2015). JPred4: a protein secondary  
886 structure prediction server. *Nucleic Acids Res* 43, W389–W394. 10.1093/nar/gkv332.
- 887 42. Bock-Bierbaum, T., Funck, K., Wollweber, F., Lisicki, E., von der Malsburg, K., von der Malsburg,  
888 A., Laborenz, J., Noel, J.K., Hessenberger, M., Jungbluth, S., et al. (2022). Structural insights into  
889 crista junction formation by the Mic60-Mic19 complex. *Science Advances* 8, eabo4946.  
890 10.1126/sciadv.abo4946.
- 891 43. Gautier, R., Douguet, D., Antony, B., and Drin, G. (2008). HELIQUEST: a web server to screen  
892 sequences with specific alpha-helical properties. *Bioinformatics* 24, 2101–2102.  
893 10.1093/bioinformatics/btn392.
- 894 44. Drews, G., and Golecki, J.R. (2004). Structure, Molecular Organization, and Biosynthesis of  
895 Membranes of Purple Bacteria. In *Anoxygenic Photosynthetic Bacteria Advances in*

- 896        Photosynthesis and Respiration., R. E. Blankenship, M. T. Madigan, and C. E. Bauer, eds.  
897        (Kluwer Academic Publishers), pp. 231–257. 10.1007/0-306-47954-0\_12.
- 898        45. Greening, C., and Lithgow, T. (2020). Formation and function of bacterial organelles. *Nat Rev*  
899        *Microbiol* 18, 677–689. 10.1038/s41579-020-0413-0.
- 900        46. Noble, J.M., Lubieniecki, J., Savitzky, B.H., Plitzko, J., Engelhardt, H., Baumeister, W., and  
901        Kourkoutis, L.F. (2018). Connectivity of centermost chromatophores in *Rhodobacter sphaeroides*  
902        bacteria. *Mol Microbiol* 109, 812–825. 10.1111/mmi.14077.
- 903        47. Scheuring, S., Nevo, R., Liu, L.-N., Mangenot, S., Charuvi, D., Boudier, T., Prima, V., Hubert, P.,  
904        Sturgis, J.N., and Reich, Z. (2014). The architecture of *Rhodobacter sphaeroides*  
905        chromatophores. *Biochimica et Biophysica Acta (BBA) - Bioenergetics* 1837, 1263–1270.  
906        10.1016/j.bbabi.2014.03.011.
- 907        48. John, G.B., Shang, Y., Li, L., Renken, C., Mannella, C.A., Selker, J.M.L., Rangell, L., Bennett,  
908        M.J., and Zha, J. (2005). The mitochondrial inner membrane protein mitofilin controls cristae  
909        morphology. *Mol Biol Cell* 16, 1543–1554. 10.1091/mbc.e04-08-0697.
- 910        49. Warnsmann, V., Marschall, L.-M., Meeßen, A.C., Wolters, M., Schürmanns, L., Basoglu, M.,  
911        Eimer, S., and Osiewacz, H.D. (2022). Disruption of the MICOS complex leads to an aberrant  
912        cristae structure and an unexpected, pronounced lifespan extension in *Podospira anserina*.  
913        bioRxiv, 2022.03.21.485166. 10.1101/2022.03.21.485166.
- 914        50. Jaschke, P.R., Saer, R.G., Noll, S., and Beatty, J.T. (2011). Modification of the Genome of  
915        *Rhodobacter sphaeroides* and Construction of Synthetic Operons. In *Methods in Enzymology*  
916        (Elsevier), pp. 519–538. 10.1016/B978-0-12-385075-1.00023-8.
- 917        51. Jiao, Y., and Newman, D.K. (2007). The pio operon is essential for phototrophic Fe(II) oxidation in  
918        *Rhodospseudomonas palustris* TIE-1. *J Bacteriol* 189, 1765–1773. 10.1128/JB.00776-06.
- 919        52. Rabl, R., Soubannier, V., Scholz, R., Vogel, F., Mendl, N., Vasiljev-Neumeyer, A., Körner, C.,  
920        Jagasia, R., Keil, T., Baumeister, W., et al. (2009). Formation of cristae and crista junctions in  
921        mitochondria depends on antagonism between Fcj1 and Su e/g. *J Cell Biol* 185, 1047–1063.  
922        10.1083/jcb.200811099.
- 923        53. Muñoz-Gómez, S.A., Slamovits, C.H., Dacks, J.B., and Wideman, J.G. (2015b). The evolution of  
924        MICOS: Ancestral and derived functions and interactions. *Communicative & Integrative Biology* 8,  
925        e1094593. 10.1080/19420889.2015.1094593.
- 926        54. Guan, Y., Zhu, Q., Huang, D., Zhao, S., Jan Lo, L., and Peng, J. (2015). An equation to estimate  
927        the difference between theoretically predicted and SDS PAGE-displayed molecular weights for an  
928        acidic peptide. *Sci Rep* 5, 13370. 10.1038/srep13370.
- 929        55. D’Amici, G.M., Rinalducci, S., Murgiano, L., Italiano, F., and Zolla, L. (2010). Oligomeric  
930        Characterization of the Photosynthetic Apparatus of *Rhodobacter sphaeroides* R26.1 by  
931        Nondenaturing Electrophoresis Methods. *J. Proteome Res.* 9, 192–203. 10.1021/pr9005052.
- 932        56. Jackson, P.J., Lewis, H.J., Tucker, J.D., Hunter, C.N., and Dickman, M.J. (2012). Quantitative  
933        proteomic analysis of intracytoplasmic membrane development in *Rhodobacter sphaeroides*. *Mol*  
934        *Microbiol* 84, 1062–1078. 10.1111/j.1365-2958.2012.08074.x.
- 935        57. Höhr, A.I.C., Lindau, C., Wirth, C., Qiu, J., Stroud, D.A., Kutik, S., Guiard, B., Hunte, C., Becker,  
936        T., Pfanner, N., et al. (2018). Membrane protein insertion through a mitochondrial  $\beta$ -barrel gate.  
937        *Science* 359, eaah6834. 10.1126/science.aah6834.
- 938        58. Doyle, M.T., and Bernstein, H.D. (2019). Bacterial outer membrane proteins assemble via  
939        asymmetric interactions with the BamA  $\beta$ -barrel. *Nat Commun* 10, 3358. 10.1038/s41467-019-  
940        11230-9.



- 941 59. Voulhoux, R., Bos, M.P., Geurtsen, J., Mols, M., and Tommassen, J. (2003). Role of a highly  
942 conserved bacterial protein in outer membrane protein assembly. *Science* 299, 262–265.  
943 10.1126/science.1078973.
- 944 60. Cadena, L.R., Gahura, O., Panicucci, B., Zíková, A., and Hashimi, H. (2021). Mitochondrial  
945 Contact Site and Cristae Organization System and F<sub>1</sub>F<sub>0</sub>-ATP Synthase Crosstalk Is a  
946 Fundamental Property of Mitochondrial Cristae. *mSphere*, e0032721. 10.1128/mSphere.00327-  
947 21.
- 948 61. Cox, J., Neuhauser, N., Michalski, A., Scheltema, R.A., Olsen, J.V., and Mann, M. (2011).  
949 Andromeda: a peptide search engine integrated into the MaxQuant environment. *J Proteome Res*  
950 10, 1794–1805. 10.1021/pr101065j.
- 951 62. Barrera, N.P., and Robinson, C.V. (2011). Advances in the mass spectrometry of membrane  
952 proteins: from individual proteins to intact complexes. *Annu Rev Biochem* 80, 247–271.  
953 10.1146/annurev-biochem-062309-093307.
- 954 63. Callister, S.J., Nicora, C.D., Zeng, X., Roh, J.H., Dominguez, M.A., Tavano, C.L., Monroe, M.E.,  
955 Kaplan, S., Donohue, T.J., Smith, R.D., et al. (2006). Comparison of aerobic and photosynthetic  
956 *Rhodobacter sphaeroides* 2.4.1 proteomes. *Journal of Microbiological Methods* 67, 424–436.  
957 10.1016/j.mimet.2006.04.021.
- 958 64. Selao, T.T., Branca, R., Chae, P.S., Lehtiö, J., Gellman, S.H., Rasmussen, S.G.F., Nordlund, S.,  
959 and Norén, A. (2011). Identification of chromatophore membrane protein complexes formed  
960 under different nitrogen availability conditions in *Rhodospirillum rubrum*. *J Proteome Res* 10,  
961 2703–2714. 10.1021/pr100838x.
- 962 65. Fejes, A.P., Yi, E.C., Goodlett, D.R., and Beatty, J.T. (2003). Shotgun proteomic analysis of a  
963 chromatophore-enriched preparation from the purple phototrophic bacterium *Rhodospseudomonas*  
964 *palustris*. *Photosynthesis Research* 78, 195–203. 10.1023/B:PRES.0000006752.81486.74.
- 965 66. Lohße, A., Ullrich, S., Katzmann, E., Borg, S., Wanner, G., Richter, M., Voigt, B., Schweder, T.,  
966 and Schüler, D. (2011). Functional Analysis of the Magnetosome Island in *Magnetospirillum*  
967 *gryphiswaldense*: The mamAB Operon Is Sufficient for Magnetite Biomineralization. *PLoS ONE* 6,  
968 e25561. 10.1371/journal.pone.0025561.
- 969 67. Lohße, A., Borg, S., Raschdorf, O., Kolinko, I., Tompa, E., Pósfai, M., Faivre, D., Baumgartner, J.,  
970 and Schüler, D. (2014). Genetic dissection of the mamAB and mms6 operons reveals a gene set  
971 essential for magnetosome biogenesis in *Magnetospirillum gryphiswaldense*. *J Bacteriol* 196,  
972 2658–2669. 10.1128/JB.01716-14.
- 973 68. van der Laan, M., Bohnert, M., Wiedemann, N., and Pfanner, N. (2012). Role of MINOS in  
974 mitochondrial membrane architecture and biogenesis. *Trends Cell Biol.* 22, 185–192.  
975 10.1016/j.tcb.2012.01.004.
- 976 69. Ott, C., Dorsch, E., Fraunholz, M., Straub, S., and Kozjak-Pavlovic, V. (2015). Detailed Analysis  
977 of the Human Mitochondrial Contact Site Complex Indicate a Hierarchy of Subunits. *PLoS ONE*  
978 10, e0120213. 10.1371/journal.pone.0120213.
- 979 70. Anwari, K., Poggio, S., Perry, A., Gatsos, X., Ramarathinam, S.H., Williamson, N.A., Noinaj, N.,  
980 Buchanan, S., Gabriel, K., Purcell, A.W., et al. (2010). A Modular BAM Complex in the Outer  
981 Membrane of the  $\alpha$ -Proteobacterium *Caulobacter crescentus*. *PLOS ONE* 5, e8619.  
982 10.1371/journal.pone.0008619.
- 983 71. Anwari, K., Webb, C.T., Poggio, S., Perry, A.J., Belousoff, M., Celik, N., Ramm, G., Lovering, A.,  
984 Sockett, R.E., Smit, J., et al. (2012). The evolution of new lipoprotein subunits of the bacterial  
985 outer membrane BAM complex. *Molecular Microbiology* 84, 832–844. 10.1111/j.1365-  
986 2958.2012.08059.x.

- 987 72. Tang, J., Zhang, K., Dong, J., Yan, C., Hu, C., Ji, H., Chen, L., Chen, S., Zhao, H., and Song, Z.  
988 (2020). Sam50-Mic19-Mic60 axis determines mitochondrial cristae architecture by mediating  
989 mitochondrial outer and inner membrane contact. *Cell Death Differ* 27, 146–160.  
990 10.1038/s41418-019-0345-2.
- 991 73. Cohen-Bazire, G., Kunisawa, R., and Poindexter, J.S. (1966). The Internal Membranes of  
992 *Caulobacter Crescentus*. *Microbiology* 42, 301–308. 10.1099/13500872-42-2-301.
- 993 74. Jiao, Y., Kappler, A., Croal, L.R., and Newman, D.K. (2005). Isolation and characterization of a  
994 genetically tractable photoautotrophic Fe(II)-oxidizing bacterium, *Rhodopseudomonas palustris*  
995 strain TIE-1. *Appl Environ Microbiol* 71, 4487–4496. 10.1128/AEM.71.8.4487-4496.2005.
- 996 75. Ehrenreich, A., and Widdel, F. (1994). Anaerobic oxidation of ferrous iron by purple bacteria, a  
997 new type of phototrophic metabolism. *Appl. Environ. Microbiol.* 60, 4517–4526.
- 998 76. Jun, D., Saer, R.G., Madden, J.D., and Beatty, J.T. (2014). Use of new strains of *Rhodobacter*  
999 *sphaeroides* and a modified simple culture medium to increase yield and facilitate purification of  
1000 the reaction centre. *Photosynth Res* 120, 197–205. 10.1007/s11120-013-9866-6.
- 1001 77. Beatty, J.T., and Gest, H. (1981). Biosynthetic and bioenergetic functions of citric acid cycle  
1002 reactions in *Rhodopseudomonas capsulata*. *J Bacteriol* 148, 584–593. 10.1128/jb.148.2.584-  
1003 593.1981.
- 1004 78. Brimacombe, C.A., Stevens, A., Jun, D., Mercer, R., Lang, A.S., and Beatty, J.T. (2013). Quorum-  
1005 sensing regulation of a capsular polysaccharide receptor for the *Rhodobacter capsulatus* gene  
1006 transfer agent (RcGTA). *Mol Microbiol* 87, 802–817. 10.1111/mmi.12132.
- 1007 79. Baba, T., Ara, T., Hasegawa, M., Takai, Y., Okumura, Y., Baba, M., Datsenko, K.A., Tomita, M.,  
1008 Wanner, B.L., and Mori, H. (2006). Construction of *Escherichia coli* K-12 in-frame, single-gene  
1009 knockout mutants: the Keio collection. *Mol Syst Biol* 2, 2006.0008. 10.1038/msb4100050.
- 1010 80. Welander, P.V., Doughty, D.M., Wu, C.-H., Mehay, S., Summons, R.E., and Newman, D.K.  
1011 (2012). Identification and characterization of *Rhodopseudomonas palustris* TIE-1 hopanoid  
1012 biosynthesis mutants. *Geobiology* 10, 163–177. 10.1111/j.1472-4669.2011.00314.x.
- 1013 81. Quandt, J., and Hynes, M.F. (1993). Versatile suicide vectors which allow direct selection for  
1014 gene replacement in gram-negative bacteria. *Gene* 127, 15–21. 10.1016/0378-1119(93)90611-6.
- 1015 82. Pinto, F.L., Thapper, A., Sontheim, W., and Lindblad, P. (2009). Analysis of current and  
1016 alternative phenol based RNA extraction methodologies for cyanobacteria. *BMC Mol Biol* 10, 79.  
1017 10.1186/1471-2199-10-79.
- 1018 83. Pfaffl, M.W. (2001). A new mathematical model for relative quantification in real-time RT-PCR.  
1019 *Nucleic Acids Res* 29, e45. 10.1093/nar/29.9.e45.
- 1020 84. Schneider, C.A., Rasband, W.S., and Eliceiri, K.W. (2012). NIH Image to ImageJ: 25 years of  
1021 image analysis. *Nat Methods* 9, 671–675. 10.1038/nmeth.2089.
- 1022 85. Mastronarde, D.N. (2005). Automated electron microscope tomography using robust prediction of  
1023 specimen movements. *J Struct Biol* 152, 36–51. 10.1016/j.jsb.2005.07.007.
- 1024 86. Mastronarde, D.N., and Held, S.R. (2017). Automated tilt series alignment and tomographic  
1025 reconstruction in IMOD. *J Struct Biol* 197, 102–113. 10.1016/j.jsb.2016.07.011.
- 1026 87. Cohen-Bazire, G., Sistrom, W.R., and Stanier, R.Y. (1957). Kinetic studies of pigment synthesis  
1027 by non-sulfur purple bacteria. *J Cell Comp Physiol* 49, 25–68. 10.1002/jcp.1030490104.

1028 88. Cox, J., Hein, M.Y., Lubner, C.A., Paron, I., Nagaraj, N., and Mann, M. (2014). Accurate proteome-  
1029 wide label-free quantification by delayed normalization and maximal peptide ratio extraction,  
1030 termed MaxLFQ. *Mol Cell Proteomics* 13, 2513–2526. 10.1074/mcp.M113.031591.

### 1031 Supplemental Material

#### 1032 **Figure S1. AlphaFold2 predictions of mitochondrial and alphaproteobacterial Mic60 homologs.**

1033 **A.** Predicted tertiary structure of the Mic60 homolog of the yeast *L. thermotolerans*.  $\alpha$ -helices are  
1034 colored according to domain (mitofilin in red, LBS1 and LBS2 in blue, middle coiled coils in green, and  
1035 transmembrane segment in orange) and follow the coordinates predicted by JPred4. **B.** Predicted  
1036 tertiary structure of the Mic60 homolog of the yeast *L. thermotolerans* colored by the pLDDT scores,  
1037 which denote confidence of predicted structure. The long  $\alpha$ 1C helix (207-382) whose structure was  
1038 experimentally resolved by Bock-Bierbaum *et al.* (2022) is indicated. **C.** Predicted tertiary structures of  
1039 the Mic60 homolog of the alphaproteobacterium *R. sphaeroides*. **D.** Predicted tertiary structure of the  
1040 Mic60 homolog of the alphaproteobacterium *R. sphaeroides* colored by the pLDDT scores.

#### 1041 **Figure S2. Verification of *mic60* and *orf52* knockout strains and IPTG-induced overexpression 1042 of Mic60 and Orf52.**

1043 **A-B.** PCR assays confirm the disruption of the *mic60* and *orf52* genes in *R.*  
1044 *palustris* (**A**) and *R. sphaeroides* (**B**). Genomic contexts of the relevant loci for the WT,  $\Delta mic60$  and  
1045  $\Delta orf52$  strains shown on top, with primer pairs and their expected amplicon sizes shown below each  
1046 schematic gene arrangement. Lower panel shows each PCR amplicon from each strain (labelled  
1047 above gel) after agarose gel electrophoresis. Size markers shown either to the left or right of the gel.  
1048 **(C)** Real time PCR showing relative abundancies of Mic60 and Orf52 mRNAs in *R. palustris* (left) and  
1049 *R. sphaeroides* (right) strains grown in the presence of the expression induction agent IPTG relative  
1050 to the same strains grown without IPTG. Error bars show standard deviation from three replicates of  
1051 assayed induced and non-induced cells.

#### 1051 **Figure S3. Chemoheterotrophic growth and absorption spectra of *mic60* and *orf52* knockout 1052 strains.**

1053 **A.** Growth curves of *R. palustris* (left) and *R. sphaeroides* (right) under chemoheterotrophic  
1054 conditions in the presence of malate to feed the respiratory chain. Figure labelled as in Figs. 3A-D.  
1055 Absorption spectra of whole *R. palustris* (left) and *R. sphaeroides* (right) WT and knockout strains  
1056 grown photoheterotrophically at either high light (**B**) or low light (**C**), as well as chemoheterotrophically  
1057 in the dark and presence of oxygen (**D**).

#### 1057 **Figure S4. Quantification branched ICM occurrence in *R. sphaeroides mic60* knockout 1058 ( $\Delta mic60$ ) and Mic60 overexpression (Mic60<sup>↑</sup>) strains.**

1059 **(A)** Representative transmission electron  
1060 micrographs of elongated (hollow arrowhead) and branched (solid arrowhead) ICMs. Imaged strain  
1061 indicated in upper corner of micrographs. Scale bar, 100 nm. Scatter plots showing blind  
1062 quantification of branched (**B**) and elongated (**C**) ICMs. Middle bar shows median value and whiskers  
1063 denote interquartile range. Statistical significance: \*\*,  $P < 0.01$ ; n.s., not significant.

#### 1063 **Figure S5. Proteomic analysis of isolated ICMs plus Mic60 and Orf52 interactomes.**

1064 **A.** Blue native gel resolved detergent-solubilized ICMs from *R. sphaeroides* WT in which the ~250 kDa band  
1065 (boxed) was excised in quadruplet for subsequent MS analysis. To right of gel is a histogram of the  
1066 Coomassie-stained band intensities (*I*) along the vertical axis of the run. The scissors denote the ~250  
1067 kDa band intensity signal. **B-C.** A list of all proteins, including excluded contaminants, found within the  
1068 enriched protein area of the volcano plots in in Figure 4A-B for Mic60 (**B**) and Orf52 (**C**). Columns as  
1069 described in legend of Figure 5C-D. Note the presence of likely contaminant found in both APs, PAS-  
1070 fold containing histidine kinase (PAS), which is a large protein amenable to LC-MS/MS in contrast to  
1071 RSP\_7517 and not found in any of our requisite proteomes. **D.** Kyle and Doolittle hydrophathy plot of  
1072 RSP\_7517, whose amino acid sequence is given below. Predicted transmembrane domain shaded  
1073 and a potential oligomerization motif AxxxA underlined. Lysine (K) residues recognized by trypsin  
1074 protease are in bold.

1075 **Dataset 1.** List of proteins found within Blue Native gel slices as indicated in Figures 3C and S4A in  
1076 quadruplicates.

- 1077 **Dataset 2.** List of all proteins found in the Orf52 and Mic60 interactomes in comparison to WT  
1078 negative controls by MS of AP eluates. Related to Figure 4A-B.
- 1079 **Table S1.** List of strains used in this study.
- 1080 **Table S2.** List of plasmids used in this study.
- 1081 **Table S3.** List of primers and their sequences used in this study.
- 1082 **Movie S1.** 3D reconstruction model of *R. sphaeroides* WT as rendered from electron tomograms  
1083 shown at the start of the video. Red, ICM membranes; yellow, cytoplasmic membrane; green, outer  
1084 membrane. Lower right corner, 200 nm scale bar.
- 1085 **Movie S2.** 3D reconstruction model of *R. sphaeroides*  $\Delta mic60$  as rendered from electron tomograms  
1086 shown at the start of the video. Red, ICM membranes; yellow, cytoplasmic membrane; green, outer  
1087 membrane. Lower right corner, 200 nm scale bar.
- 1088 **Movie S3.** 3D reconstruction model of *R. sphaeroides* Mic60 $\uparrow$  as rendered from electron tomograms  
1089 shown at the start of the video. Red, ICM membranes; yellow, cytoplasmic membrane; green, outer  
1090 membrane. Lower right corner, 200 nm scale bar.
- 1091 **Movie S4.** 3D reconstruction model of *R. sphaeroides*  $\Delta orf52$  as rendered from electron tomograms  
1092 shown at the start of the video. Red, ICM membranes; yellow, cytoplasmic membrane; green, outer  
1093 membrane. Lower right corner, 200 nm scale bar.
- 1094 **Movie S5.** 3D reconstruction model of *R. sphaeroides* Orf52 $\uparrow$  as rendered from electron tomograms  
1095 shown at the start of the video. Red, ICM membranes; yellow, cytoplasmic membrane; green, outer  
1096 membrane. Lower right corner, 200 nm scale bar.
- 1097



**A**

Eukaryotes

*Homo sapiens* B9A067  
*Caenorhabditis briggsae* Q22505  
*Monosiga brevicollis* AV9778  
*Neurospora tetrasperma* F8N093  
*Schizosaccharomyces pombe* O59725  
*Ceatomium thermophilum* G0SHY5  
*Oryza brachyantha* I1PPP7  
*Galdieria sulphuraria* M2X5V3  
*Ectocarpus siliculosus* D7FKC6  
*Phytophthora parasitica* Y9FMV7  
*Nannochloropsis gadihana* K8Z4Z5  
*Naegleria gruberi* D2UX68  
*Azospirillum* sp. CAG.260 R6HN10  
*Roseobacter* sp. CCS2 AEH52  
*Parvibaculum lavamentivorans* A7HST8  
*Thebassobium* sp. R2A62 C7DF05  
*Labyrinthia* sp. C1B10 U7FP97  
*Methylocystis* sp. J7Q4L6  
*Hypomicrobium dentrificans* D8JY35  
*Nitrospira hamburgensis* Q1QQP3  
*Bradyrhizobium* sp. YR681 J2VLN6  
*Dinoroseobacter shibae* A8LP85  
*Magnetospira* sp. W6KJ05  
*Magnetospirillum halli* H8FTY7  
*Rhodospirillum rubrum* Q2RND4  
*Rhodospirillum centenum* B61PP9  
*Rhodospseudomonas palustris* EG6YI8  
*Rhodobacter sphaeroides* 2.4.1

325D      335L      345D      355L      365A      375V      385A      395V      405A      415K      425A  
 GVYSEETLRARFYAVQKLARRVAMIDETRNSLYQYFLSYLQSLLLFFPQQLKPPPEEDILSYASYCIEHGDLELAAKFFVNLKGESRRVADQWLKEARMTLETQKQIVILETAYASA  
 GTYTEQDLKNRFEQLYKIGRKTA SIDENGGTLGAYFWYSYKSLFLVDDAIDVNNNTDNYELSRKQVYHNGDLKAIRVVQLKGGPAHLARWDIVDTRSYLESRLLAQLLVAAAA  
 GVPASAHDIYANFDQVKAARKVKVAYV-SPGEGFWISVASHVILSALTFETRGLVAGDDVNSILARQAQYLIESDDLQDAARMMNLTGLAKOMAYDWLQDARQHLAVAQSLKLVNAHLSN  
 GIPPTAEILDRFRRVTTVEVRKASLLP-EDAGVASHASSYVLKMFKRKEGLAAGDDVESILTRTOTYHLEEGDLNAAREMMNGLKGAWKTLSRDWLGEVRKLVLEQQALDVIQAEARLQ  
 VIEKIEELQTFDFTLSKEIYKTCFLTTE-SGFFGHLKSIILSQLPAAVFKSPDIVSVKKTLEDARSHLKDLDGSRVALLSLSQVPRALSDDWLNACRRRMLQQQAIEIKASAT--  
 GISTRALIDRFRRVANVRKASLLP-EDAGLASHASSYVILSKVLFKKPVATDDVESILARTAFLEEGDLNAAREMMNLTGWSKTSLSRDWLAEVRKLVLEVRQLLEVQAEARLQ  
 GSDTPMDLQKQFNLSKETVRHFSLPIAGGGGMLTHAVAHVASSIKIK-EDQSGDIESSLNRVENLIHIGDLGAAEALEGLQGEAAIEASEWVKQARKIAEQTTLTLLHSYASS-  
 GIPSEAEILHRFHRILKHLRRAALIPEEKSSLSHWMYVILAWLKIPERVLSEGNDAESKISRAEYVYTKHNLQSAVRELEGLNLCADLSDWLSLARWRVVOAQVQVLEEAALA-  
 GIPTVSQLKQRFGLVKAECRRRALVPEAGNGMGHVLASALAKITFAPKGMVGEDEAEGLVLRADYLLLEAGELQSAVGEDLKLHGLPADVAMDWLKAKRLLTADAEALRVIRCHAS--  
 GAPSVSQQLQERFKVYKSVGHRRAALVP-ENSGIIGQAFGTALSLMIPPGGPIEGKDTAVLSRAEFALKAGDIEKAIVEMKGLSGLPAQVSDWVIAAASRLVAEGQTKVVKAHV--  
 GVLKLDLDTLSRFKIVKKAIAEASLIPEE-TLGLMLLAKTLVSGVVAEEGFDGDSLPAILSRAEFYLKQKRLTDAVNIHKKPVTOVIDEWAETEARNLLVEQLETMSHLL--  
 GVKQNSLNIIEFKKILYRRLAKVQTKQDEGKNWKEVLNIFKNEVQVKVKNVNDLSPONEAEFKKINEEVKNGNLQALDGLHQLDSSNDPAMQKMWTEVQARINFNOAIANISAHSLA-  
 GVPTLASLQDQDPMARVALRTDSALGVEISGEEITFGFGAFMRNQQFDVRTTPQNGDSADAISALPEVARAEMSDWLGQAEARADAIEAIVADMSTSLSDN  
 GVTMKSLEAFRRSLSQNIIEAERAGED-GWWSRFVSNAKSLVTRVRRTEIGSDTTEAVVARMEEKLKVNLDAGAAEAQKLGQAAEAEEAAAPVADAEARLQADALVRLLSARVAGQ  
 GVPTRASIQDGFDPAAARALASVRSETPESGISG----FLKSQFGARSTKPREGDDPAVLSRVOQAVDEGRLTDALEAIEITLPEVGRaelTEWIASVTARDALNAGELAGSLGNS  
 GEVPEVQLIAQFPPVARSVYQTFSEPRSDGLDLTMSQAQSLFTVRRSSEGGDGAALORMENAVRKGDLKSAALAAVKDLPQQGAAAADWATRAEARVEVDLTDKASQEVLSN  
 GAPTAAKADFPAAAKRHH-ALLESAGSDLTHELMKASGLVVRVPSGQAAEQTVEEKVAHIEAALAHGLAQANAVFAALPEAQNEAKDFGATLRARVDAGRAADDLLHGAIA-  
 GAPTALAEIKTEFRPANAAMDAAE-SGTQNSGVDRDLWAEAKSVVRVRRIDLKPPDSTEAVALGRMQVALNDGRIQGVLELSDLPQPQDQAAARPFLDRLNARVGVDSLTLAQLEAQL--  
 GVPSATVLCRELLAIVPKLAPAPAPTGTSTIVDRLQEGAAARLVRIERIDAPSDSTGAVVRITARSARNDVAAARAELNKLPPADRITTAEPWIAKADAYDAALASRSQFADAMA-  
 GIPTPVALSRELLNIVPKLSPAAEVPAAAGAVIRLQAGASKLVRIERTDGV-GNDRGAVVARTAAALRNDVFEARREKLTPEADRAPAQAWLDKTDAREEALAAASRKFADAMA-  
 GIVETLLDQRQFPAAARGLAESLKATVSDDPVDRAVAFILRAQVGRSLPEREGDDPAVLSRAQEAASAGQLEAALAEISTDPDAGQAAMAPWIGAAEARVAALAFDTLAELNSN  
 GVPITVEALRIQFSEQAADIVRAGMVAADDGWDQDMNRVLVSVVRRITDNLSGEGADALVARAESALTGDLTTAVQVLGDLTGPGGLQAAAAPWLSAQSRLTADSAGRLQGH--  
 GIPTRIIALLGRLEHLEAPEIVRAELIPAE-QGWSRRARHALLSLVSVIRRRGLVAGNDATAIIVARAESNMGDLAGAVSEIDLVYYPGAEAAAAPWLGQAKARIAADKALSELTAHSIA-  
 GVSTRALAAARFDDVSRALISQAVLSP-EGDTWLERTFEALTSVTVVRRVDDGAGTGAAEILAEAEELVLENDLGAVVAALKGLDQAAAAEASAPWQAAEDKLTAEALSLTGAQALAR  
 GLPFAALHEFRRLAPEVIRADRTRT-DADWLDLTLGRLSNIVTVRRRAGDIGADGASIVARAEELNOGNTLAVKLDLTPGAAQTLGPMMADARSRVAEAKSQAQTDAAVTR  
 GVPSAHALGHVELDLPLKPL--DKTANSANLDRFOANERLVIQRSDAVEGIDRTAVIGRLTAAGKQDIIAALKEKALAPGDRAPVQSWIDKAEARDQALAAASHQFATAALG-  
 GIPITLDTLEDFPAAAREALAVSRRATMGDSWTSRAQAFLLSEAGVRSAPRAGDGPDAVLSRAEAARVAGDLQKALDEVAALLPPEGQQAAMAGWTDVARKRIEADIEVAALAAAAEKG

Alphaproteobacteria

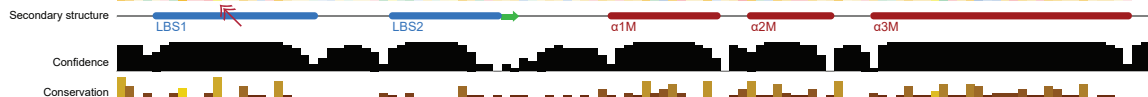**B**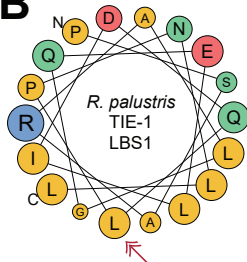**C**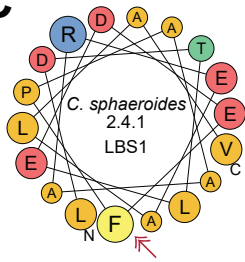**D**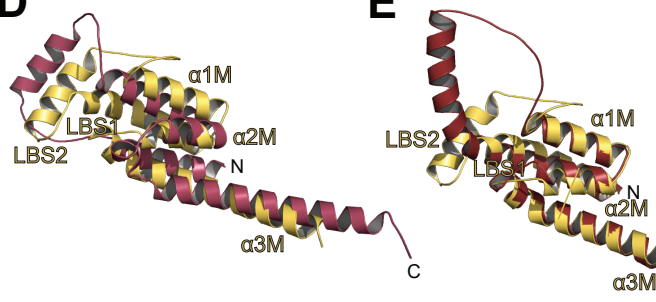**E**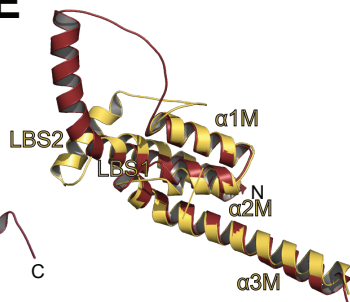

**A**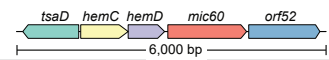

bioRxiv preprint doi: <https://doi.org/10.1101/2022.06.14.498148>; this version posted December 6, 2022. The copyright holder for this preprint (which was not certified by peer review) is the author/funder, who has granted bioRxiv a license to display the preprint in perpetuity. It is made available under aCC-BY-NC-ND 4.0 International license.

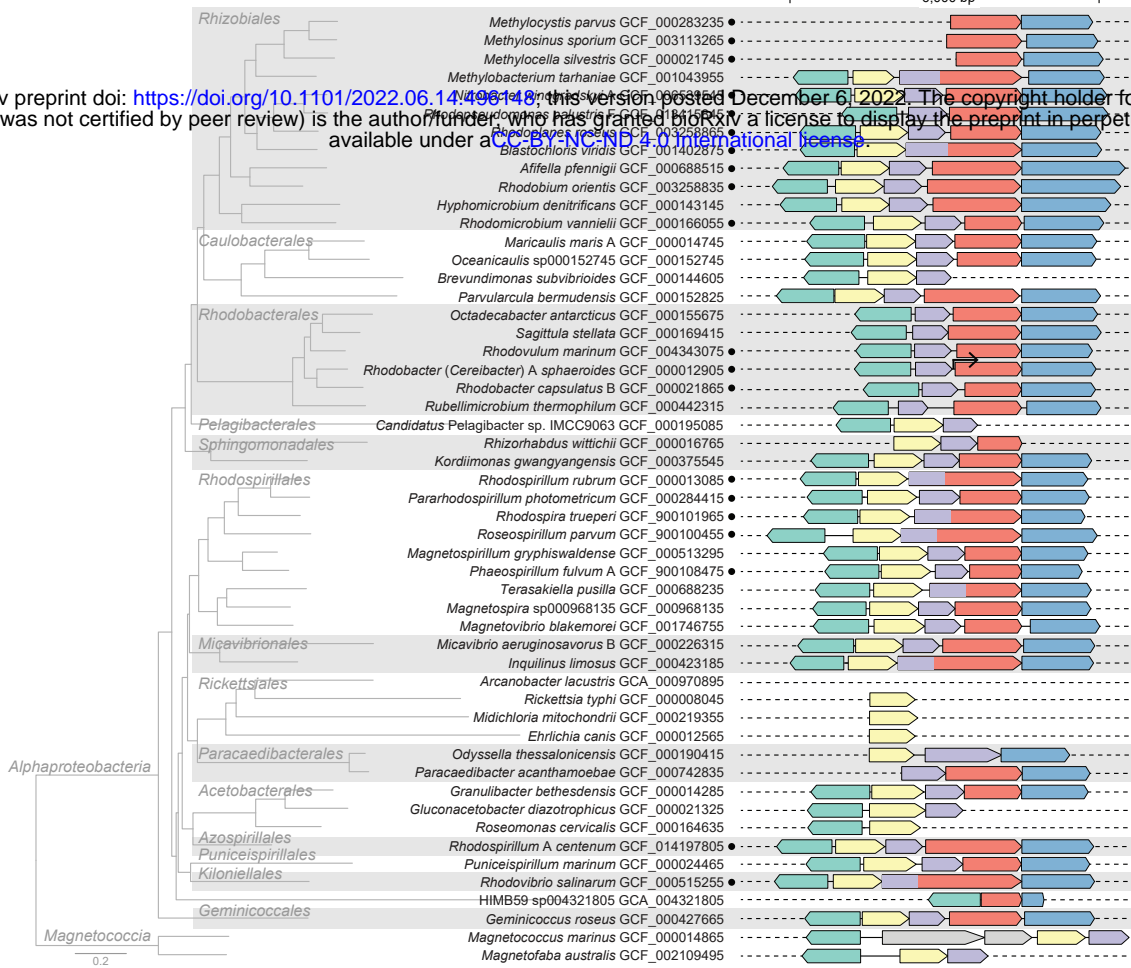**B**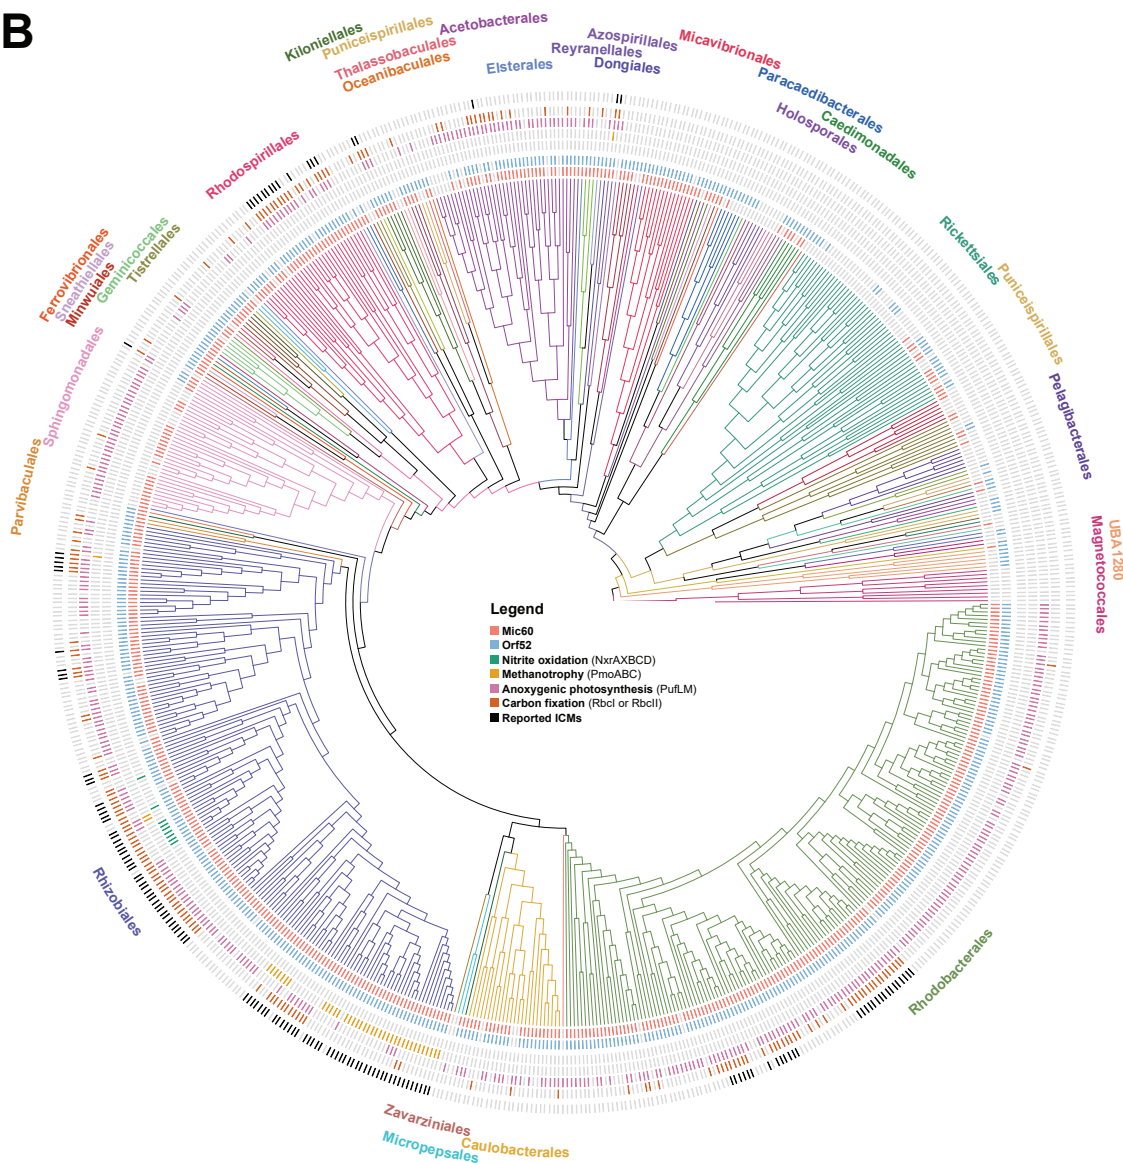

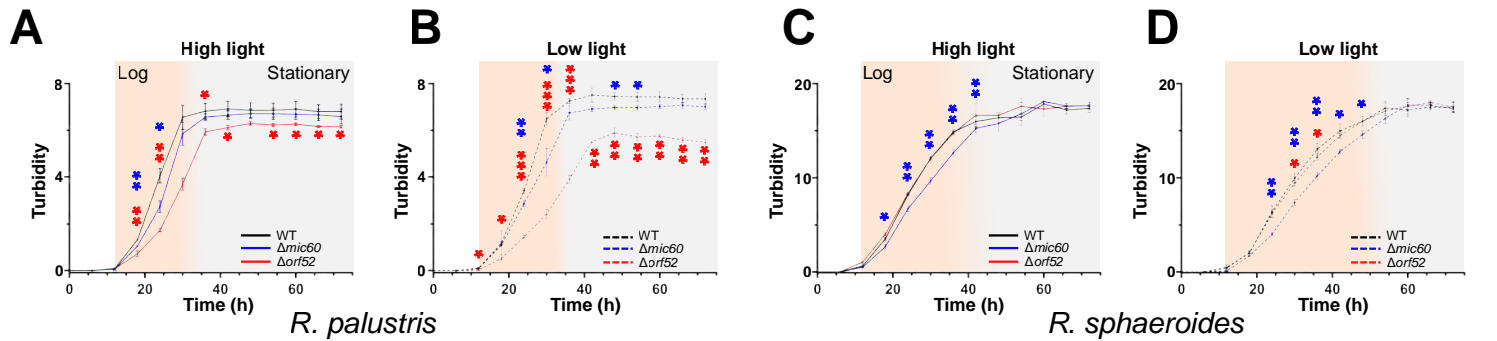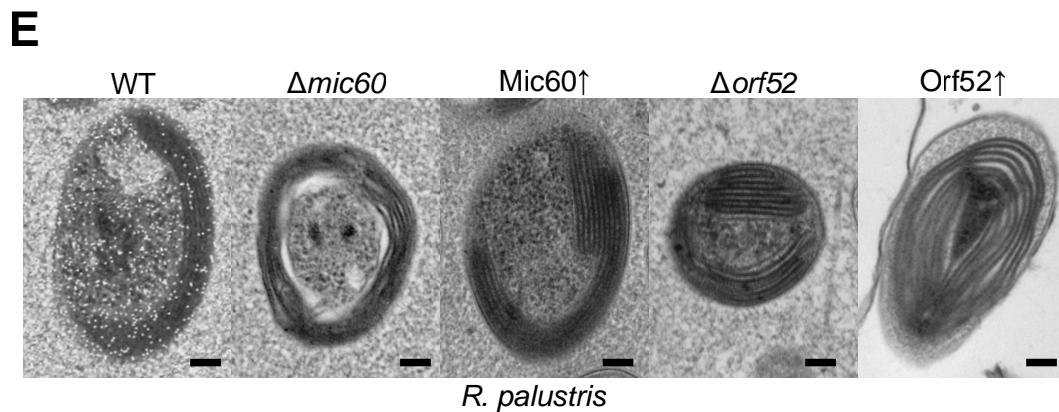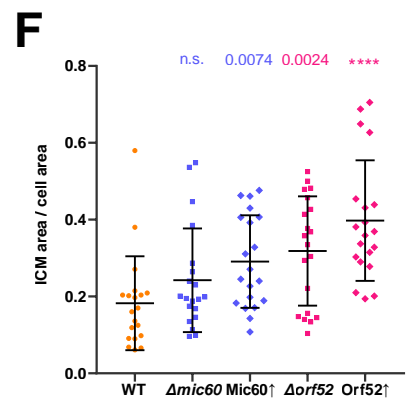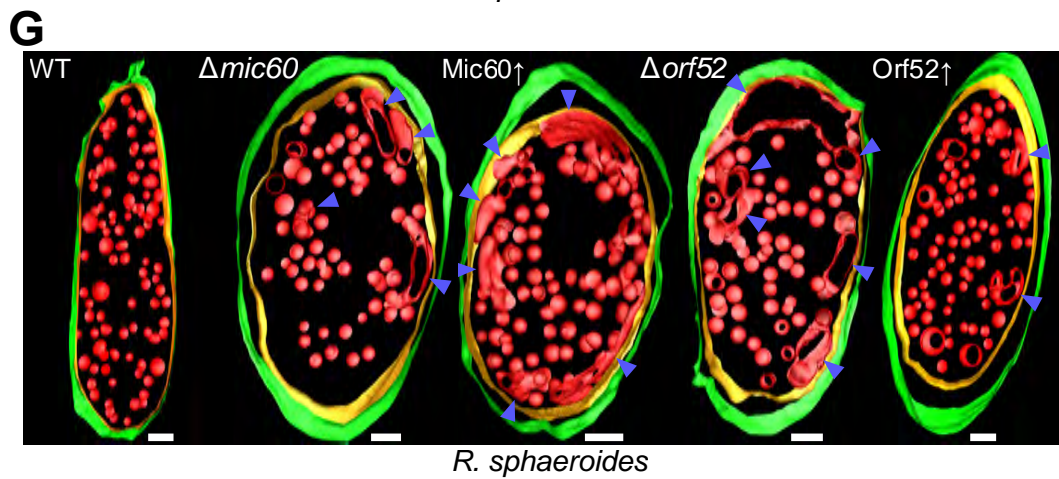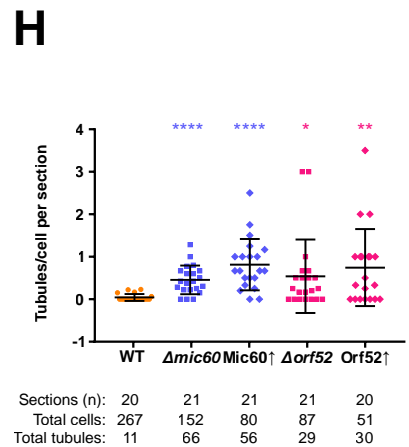

**A**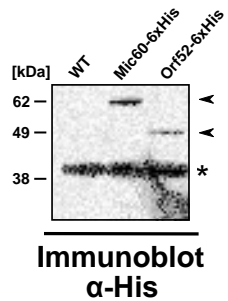**B**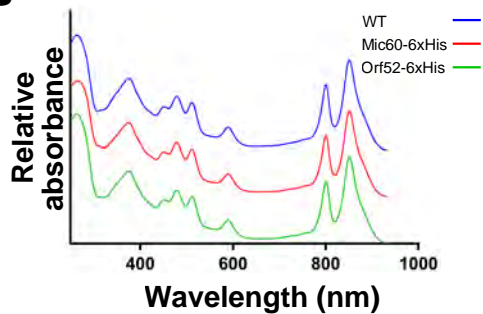**C**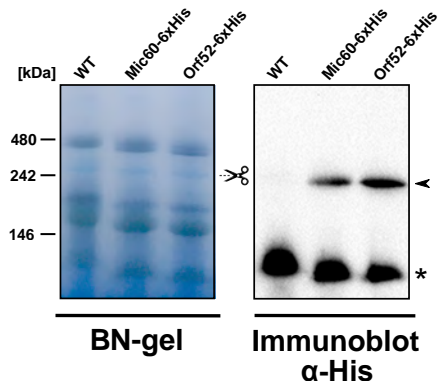**D**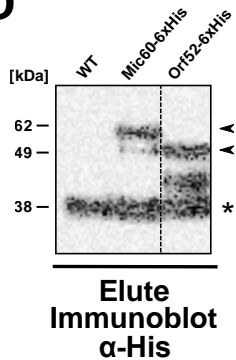



**A**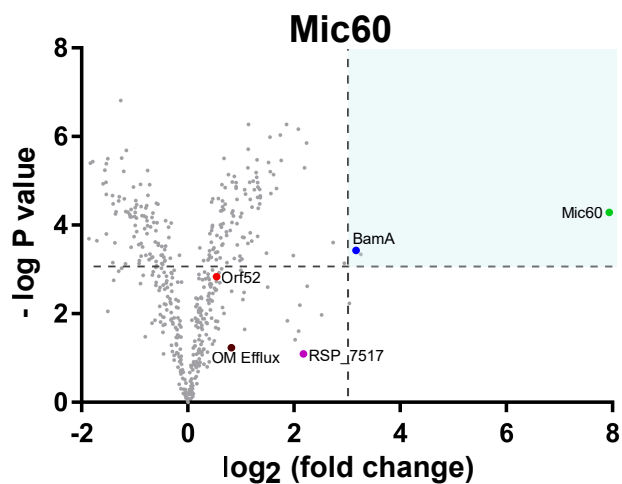**B**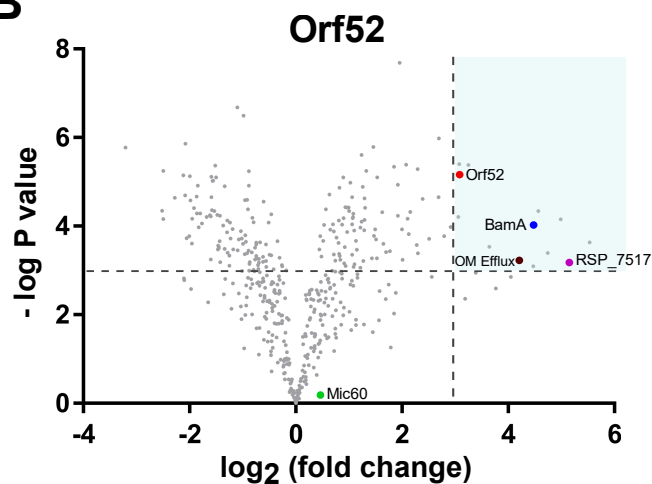**C**

### Mic60

| Protein |  | Fold change | UPB ICM | 250 kDa complex | Mol. weight [kDa] |
|---------|--|-------------|---------|-----------------|-------------------|
| Mic60   |  | 245.13      | ○ ○*    | ●               | 43.8              |
| BamA    |  | 9.09        | ● — ●   | ●               | 88.2              |

**D**

### Orf52

| Protein           |  | Fold change | UPB ICM | 250 kDa complex | Mol. weight [kDa] |
|-------------------|--|-------------|---------|-----------------|-------------------|
| RSP_7517          |  | 35.62       | ○ ○     | ●               | 4.8               |
| BamA              |  | 22.38       | ● — ●   | ●               | 88.2              |
| OM Efflux protein |  | 18.52       | ● — ●   | ●               | 49.7              |
| Orf52             |  | 8.50        | ● — ●   | ●               | 52.5              |

**E**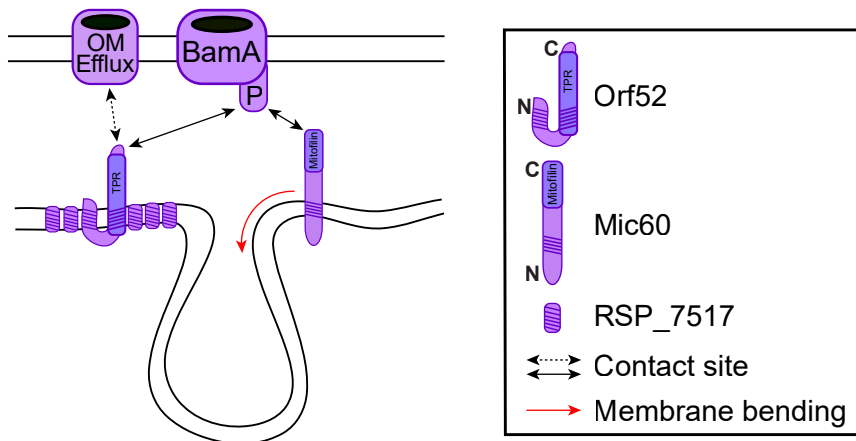

Source: https://www.biorxiv.org/content/10.1101/2022.06.14.496148v2.full.pdf
